# Supplementary material for: Design, synthesis and anticancer evaluation of imamine-1,3,5-triazine derivatives
Source: Royal Society of Chemistry journal article supplement (doi:10.1039/d4nj00819g), 2024-01-01
Supplement: d4nj00819g1.pdf [file d4nj00819g1.pdf]

SUPPLEMENTARY INFORMATION

**Design, Synthesis and Anticancer evaluation of Imamine-1,3,5-triazine derivatives**

Xuan-Yi Xue <sup>a,1</sup>, Jing-Liang He <sup>a,1</sup>, Rui-Li <sup>a</sup>, Bo-Ding <sup>b</sup>, Wen-Long Wu <sup>a</sup>, Yao-Yao Cao <sup>a</sup>, Ran-He <sup>a</sup>, Peng- Hong Hu <sup>a</sup>, Jing Ji <sup>a,\*</sup> and Da-Hua Shi <sup>a,\*</sup>

<sup>a</sup>School of Pharmacy, Jiangsu Key Laboratory of Marine Bioresources and Environment, Co-Innovation Center of Jiangsu Marine Bio-industry Technology, Jiangsu Ocean University, Lianyungang 222005, People's Republic of China.

<sup>b</sup>Jiangsu Henghai Pharmaceutical Research Institute Co., LTD, Lianyungang 222005, People's Republic of China.

## TABLE OF CONTENTS

|                                                                        |    |
|------------------------------------------------------------------------|----|
| Figure 1 The IR spectrum of compound <b>4a</b> .....                   | 1  |
| Figure 2 The <sup>1</sup> H NMR spectrum of compound <b>4a</b> .....   | 1  |
| Figure 3 The <sup>13</sup> C NMR spectrum of compound <b>4a</b> .....  | 2  |
| Figure 4 The HRMS spectrum of compound <b>4a</b> .....                 | 2  |
| Figure 5 The HPLC of compound <b>4a</b> .....                          | 3  |
| Figure 6 The IR spectrum of compound <b>4b</b> .....                   | 3  |
| Figure 7 The <sup>1</sup> H NMR spectrum of compound <b>4b</b> .....   | 4  |
| Figure 8 The <sup>13</sup> C NMR spectrum of compound <b>4b</b> .....  | 4  |
| Figure 9 The HRMS spectrum of compound <b>4b</b> .....                 | 5  |
| Figure 10 The HPLC of compound <b>4b</b> .....                         | 5  |
| Figure 11 The HPLC of DMSO .....                                       | 6  |
| Figure 12 The IR spectrum of compound <b>4c</b> .....                  | 6  |
| Figure 13 The <sup>1</sup> H NMR spectrum of compound <b>4c</b> .....  | 7  |
| Figure 14 The <sup>13</sup> C NMR spectrum of compound <b>4c</b> ..... | 7  |
| Figure 15 The HRMS spectrum of compound <b>4c</b> .....                | 8  |
| Figure 16 The HPLC of compound <b>4c</b> .....                         | 8  |
| Figure 17 The IR spectrum of compound <b>4d</b> .....                  | 9  |
| Figure 18 The <sup>1</sup> H NMR spectrum of compound <b>4d</b> .....  | 9  |
| Figure 19 The <sup>13</sup> C NMR spectrum of compound <b>4d</b> ..... | 10 |
| Figure 20 The HRMS spectrum of compound <b>4d</b> .....                | 10 |
| Figure 21 The HPLC of compound <b>4d</b> .....                         | 11 |
| Figure 22 The IR spectrum of compound <b>4e</b> .....                  | 11 |
| Figure 23 The <sup>1</sup> H NMR spectrum of compound <b>4e</b> .....  | 12 |
| Figure 24 The <sup>1</sup> H NMR spectrum of compound <b>4e</b> .....  | 12 |
| Figure 26 The HPLC of compound <b>4e</b> .....                         | 13 |
| Figure 27 The IR spectrum of compound <b>4f</b> .....                  | 14 |
| Figure 28 The <sup>1</sup> H NMR spectrum of compound <b>4f</b> .....  | 14 |
| Figure 29 The <sup>13</sup> C NMR spectrum of compound <b>4f</b> ..... | 15 |
| Figure 30 The HRMS spectrum of compound <b>4f</b> .....                | 15 |
| Figure 31 The HPLC of compound <b>4f</b> .....                         | 16 |
| Figure 32 The IR spectrum of compound <b>4g</b> .....                  | 17 |
| Figure 33 The <sup>1</sup> H NMR spectrum of compound <b>4g</b> .....  | 17 |
| Figure 34 The <sup>1</sup> H NMR spectrum of compound <b>4g</b> .....  | 18 |
| Figure 35 The HRMS spectrum of compound <b>4g</b> .....                | 18 |
| Figure 36 The HPLC of compound <b>4g</b> .....                         | 19 |
| Figure 37 The IR spectrum of compound <b>4h</b> .....                  | 19 |
| Figure 38 The <sup>1</sup> H NMR spectrum of compound <b>4h</b> .....  | 20 |
| Figure 39 The <sup>13</sup> C NMR spectrum of compound <b>4h</b> ..... | 20 |
| Figure 40 The HRMS spectrum of compound <b>4h</b> .....                | 21 |
| Figure 41 The HPLC of compound <b>4h</b> .....                         | 21 |
| Figure 42 The IR spectrum of compound <b>4i</b> .....                  | 22 |
| Figure 43 The <sup>1</sup> H NMR spectrum of compound <b>4i</b> .....  | 22 |

|                                                                        |    |
|------------------------------------------------------------------------|----|
| Figure 44 The <sup>13</sup> C NMR spectrum of compound <b>4i</b> ..... | 23 |
| Figure 45 The HRMS spectrum of compound <b>4i</b> .....                | 23 |
| Figure 46 The HPLC of compound <b>4i</b> .....                         | 24 |
| Figure 47 The IR spectrum of compound <b>4j</b> .....                  | 25 |
| Figure 48 The <sup>1</sup> H NMR spectrum of compound <b>4j</b> .....  | 25 |
| Figure 49 The <sup>13</sup> C NMR spectrum of compound <b>4j</b> ..... | 26 |
| Figure 50 The HRMS spectrum of compound <b>4j</b> .....                | 26 |
| Figure 51 The HPLC of compound <b>4j</b> .....                         | 27 |
| Figure 52 The IR spectrum of compound <b>4k</b> .....                  | 27 |
| Figure 53 The <sup>1</sup> H NMR spectrum of compound <b>4k</b> .....  | 28 |
| Figure 54 The <sup>13</sup> C NMR spectrum of compound <b>4k</b> ..... | 28 |
| Figure 55 The HRMS spectrum of compound <b>4k</b> .....                | 29 |
| Figure 56 The HPLC of compound <b>4k</b> .....                         | 29 |
| Figure 57 The IR spectrum of compound <b>4l</b> .....                  | 30 |
| Figure 58 The <sup>1</sup> H NMR spectrum of compound <b>4l</b> .....  | 30 |
| Figure 59 The <sup>13</sup> C NMR spectrum of compound <b>4l</b> ..... | 31 |
| Figure 60 The HRMS spectrum of compound <b>4l</b> .....                | 31 |
| Figure 61 The HPLC of compound <b>4l</b> .....                         | 32 |
| Figure 62 The IR spectrum of compound <b>4m</b> .....                  | 33 |
| Figure 63 The <sup>1</sup> H NMR spectrum of compound <b>4m</b> .....  | 33 |
| Figure 64 The <sup>13</sup> C NMR spectrum of compound <b>4m</b> ..... | 34 |
| Figure 65 The HRMS spectrum of compound <b>4m</b> .....                | 34 |
| Figure 66 The HPLC of compound <b>4m</b> .....                         | 35 |
| Figure 67 The IR spectrum of compound <b>4n</b> .....                  | 35 |
| Figure 68 The <sup>1</sup> H NMR spectrum of compound <b>4n</b> .....  | 36 |
| Figure 69 The <sup>13</sup> C NMR spectrum of compound <b>4n</b> ..... | 36 |
| Figure 70 The HRMS spectrum of compound <b>4n</b> .....                | 37 |
| Figure 71 The HPLC of compound <b>4n</b> .....                         | 37 |
| Figure 72 The IR spectrum of compound <b>4o</b> .....                  | 38 |
| Figure 73 The <sup>1</sup> H NMR spectrum of compound <b>4o</b> .....  | 38 |
| Figure 74 The <sup>13</sup> C NMR spectrum of compound <b>4o</b> ..... | 39 |
| Figure 75 The HRMS spectrum of compound <b>4o</b> .....                | 39 |
| Figure 76 The HPLC of compound <b>4o</b> .....                         | 40 |
| Figure 77 The IR spectrum of compound <b>4p</b> .....                  | 40 |
| Figure 78 The <sup>1</sup> H NMR spectrum of compound <b>4p</b> .....  | 41 |
| Figure 79 The <sup>13</sup> C NMR spectrum of compound <b>4p</b> ..... | 41 |
| Figure 80 The HRMS spectrum of compound <b>4p</b> .....                | 42 |
| Figure 81 The HPLC of compound <b>4p</b> .....                         | 42 |
| Table 1 Crystallographic data for compound <b>4a</b> .....             | 43 |

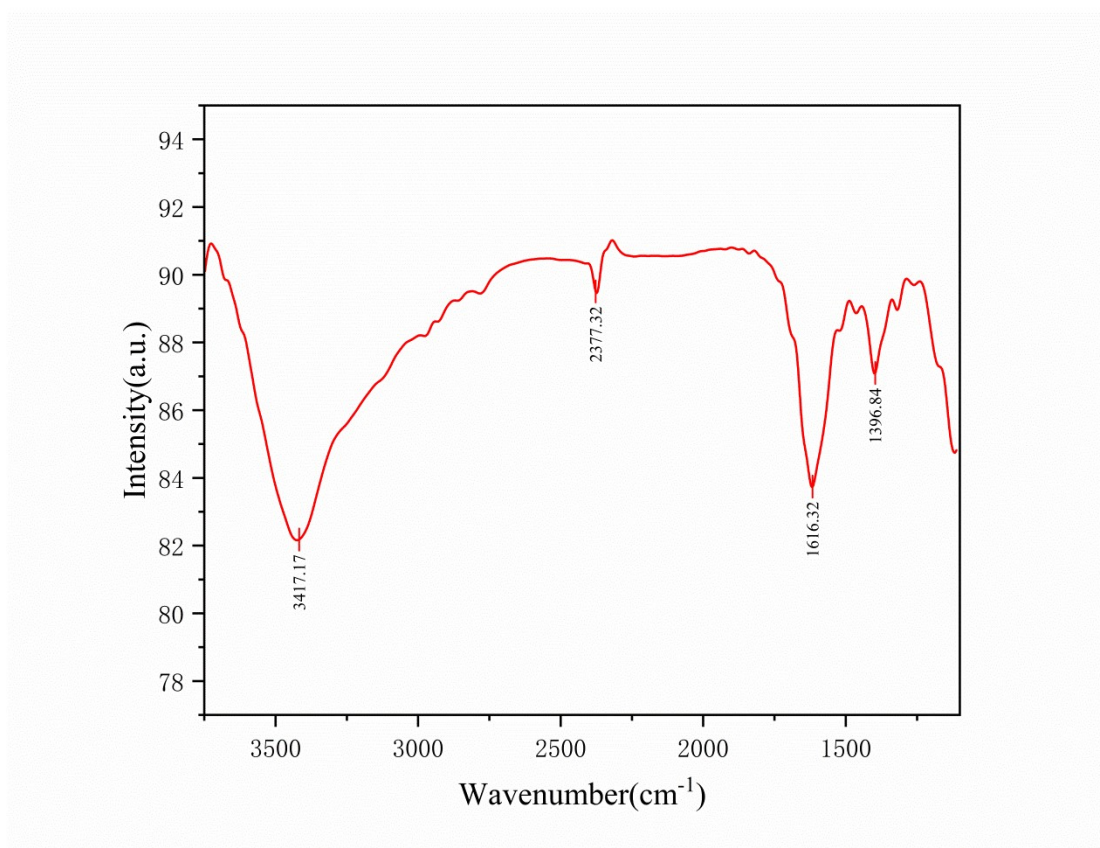

Figure 1 The IR spectrum of compound 4a

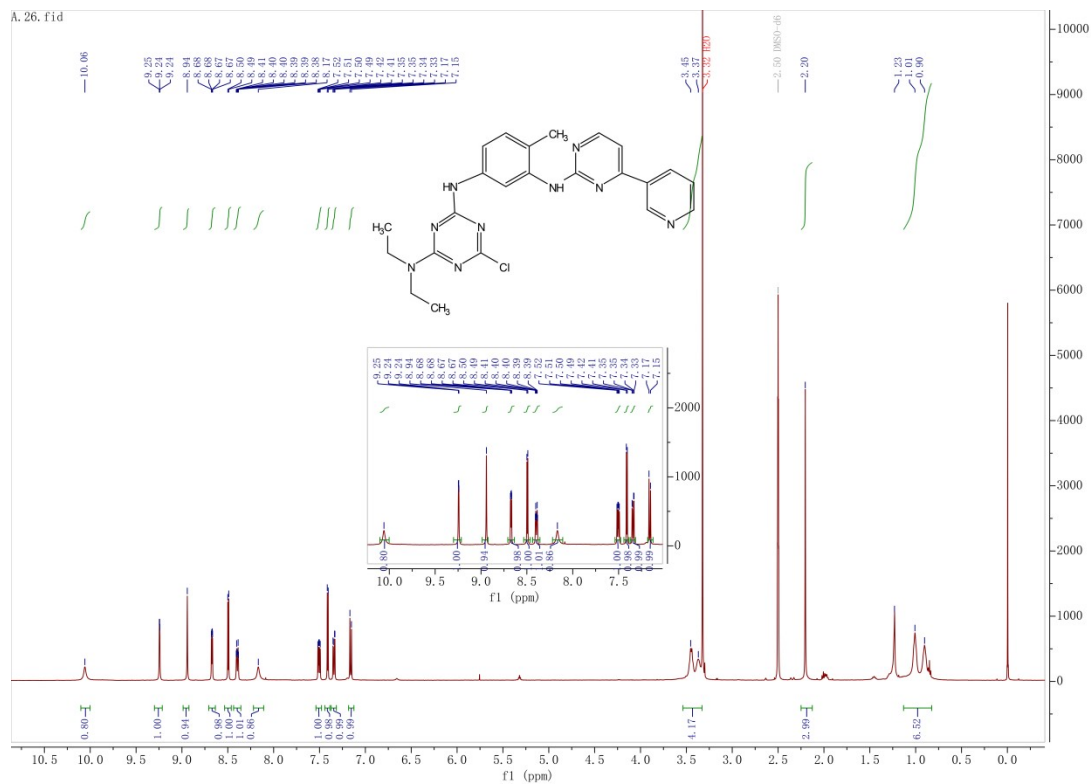

Figure 2 The <sup>1</sup>H NMR spectrum of compound 4a

15 C/11

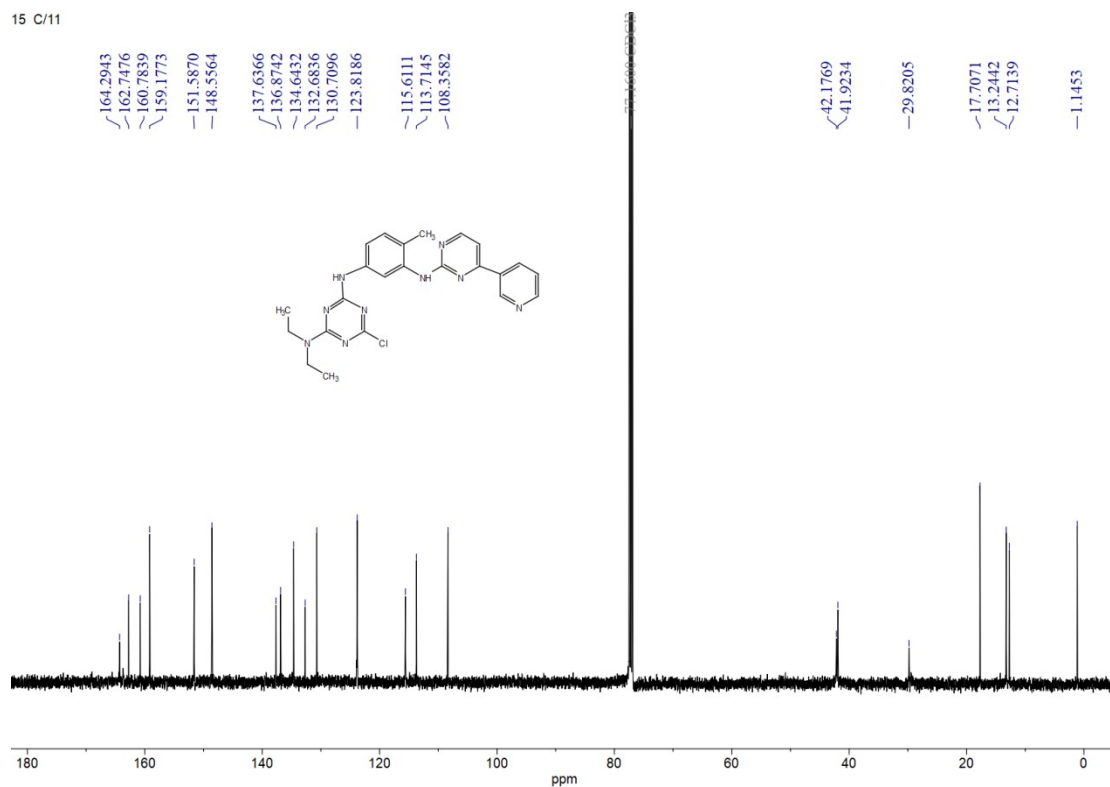

Figure 3 The <sup>13</sup>C NMR spectrum of compound 4a

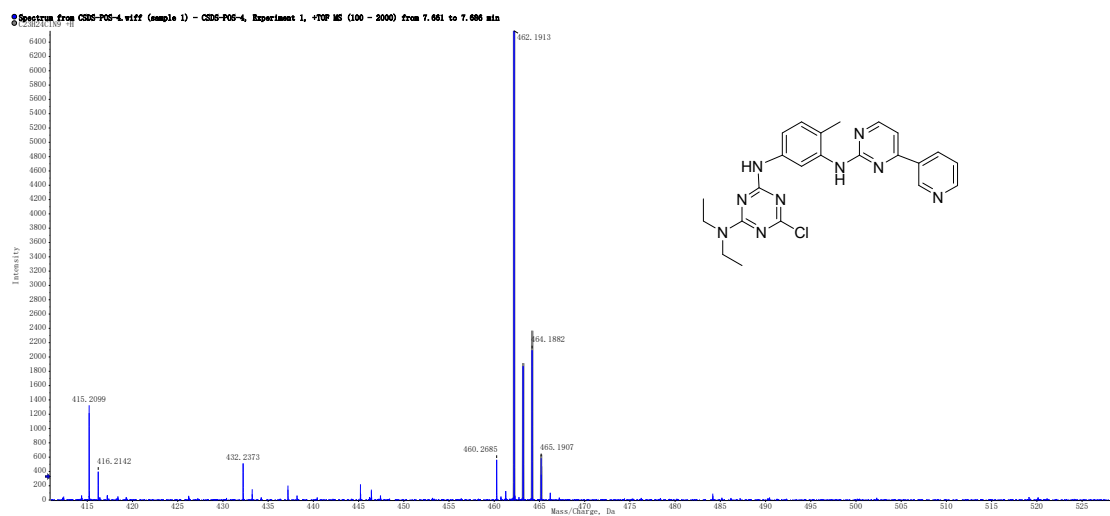

Figure 4 The HRMS spectrum of compound 4a

<色谱图>

mV

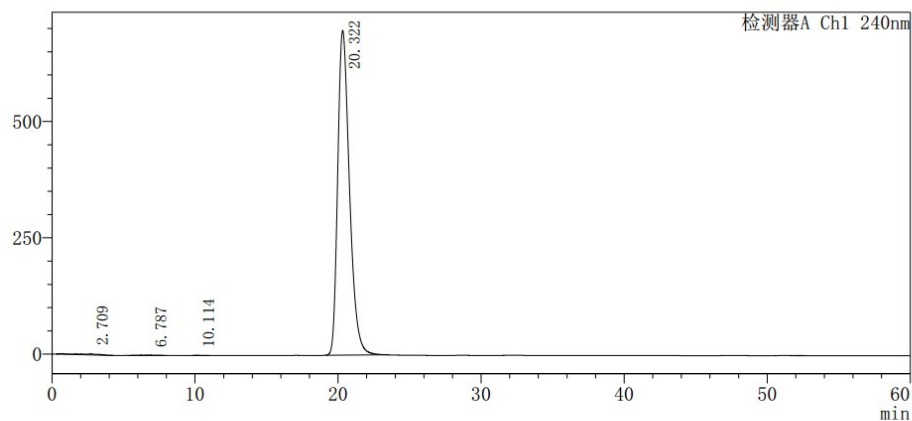

<峰表>

检测器A Ch1 240nm

| 峰号 | 保留时间   | 面积       | 高度     | 浓度     | 浓度单位 | 标记 | 化合物名 |
|----|--------|----------|--------|--------|------|----|------|
| 1  | 2.709  | 264143   | 2922   | 0.656  |      | M  |      |
| 2  | 6.787  | 71808    | 724    | 0.178  |      | M  |      |
| 3  | 10.114 | 9297     | 417    | 0.023  |      | M  |      |
| 4  | 20.322 | 39933254 | 697798 | 99.143 |      | M  |      |
| 总计 |        | 40278502 | 701861 |        |      |    |      |

Figure 5 The HPLC of compound 4a

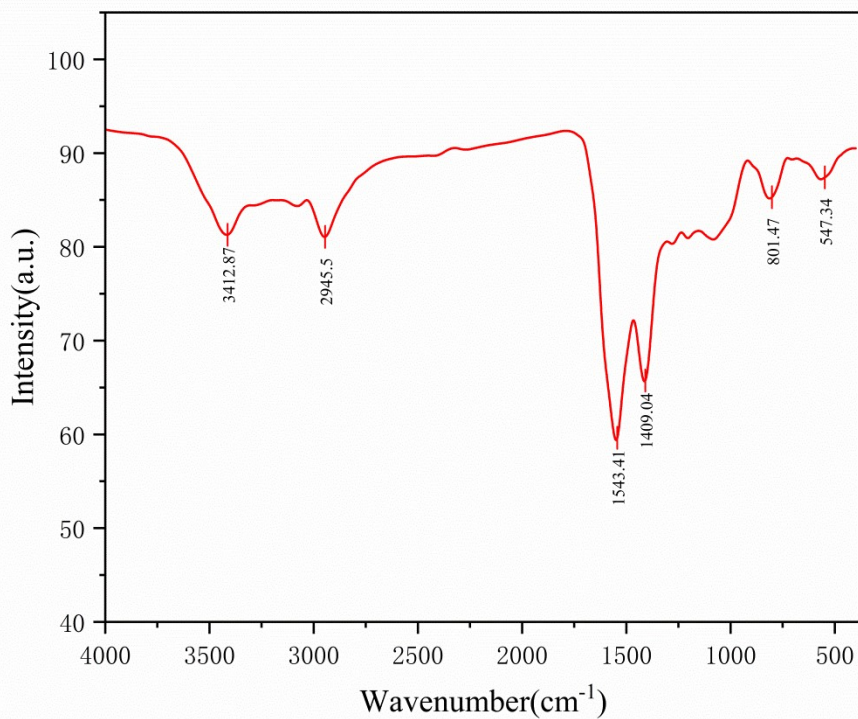

Figure 6 The IR spectrum of compound 4b

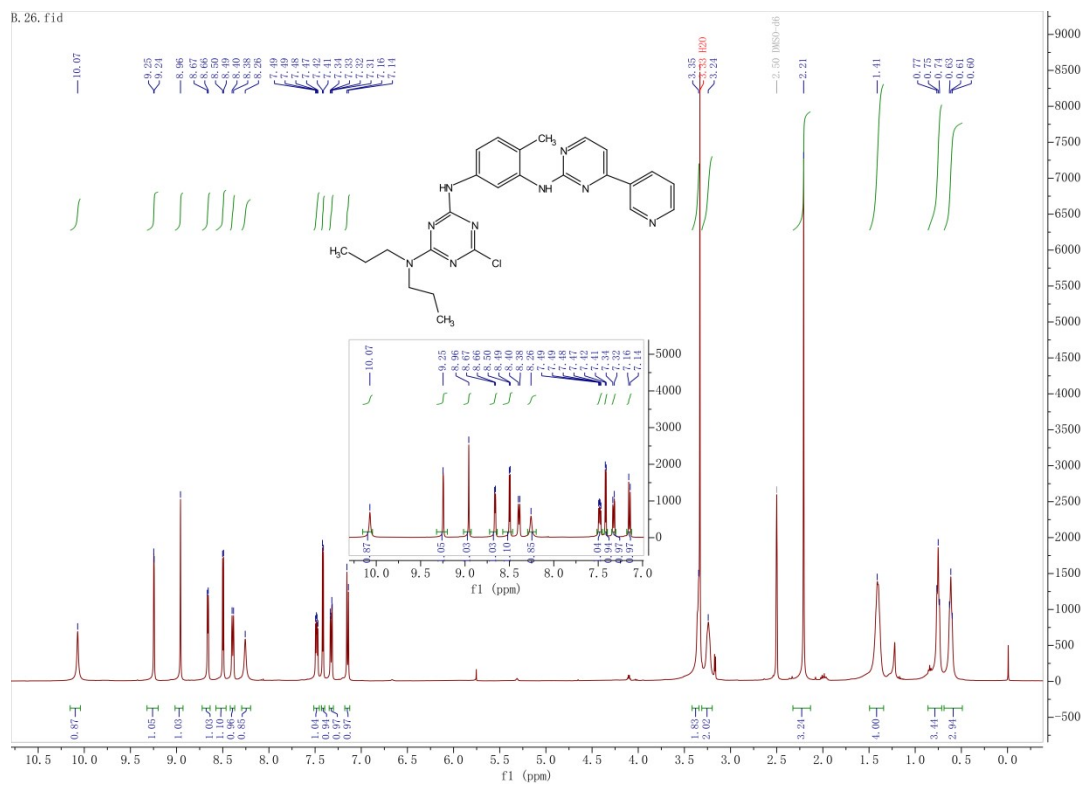

Figure 7 The  $^1\text{H}$  NMR spectrum of compound **4b**

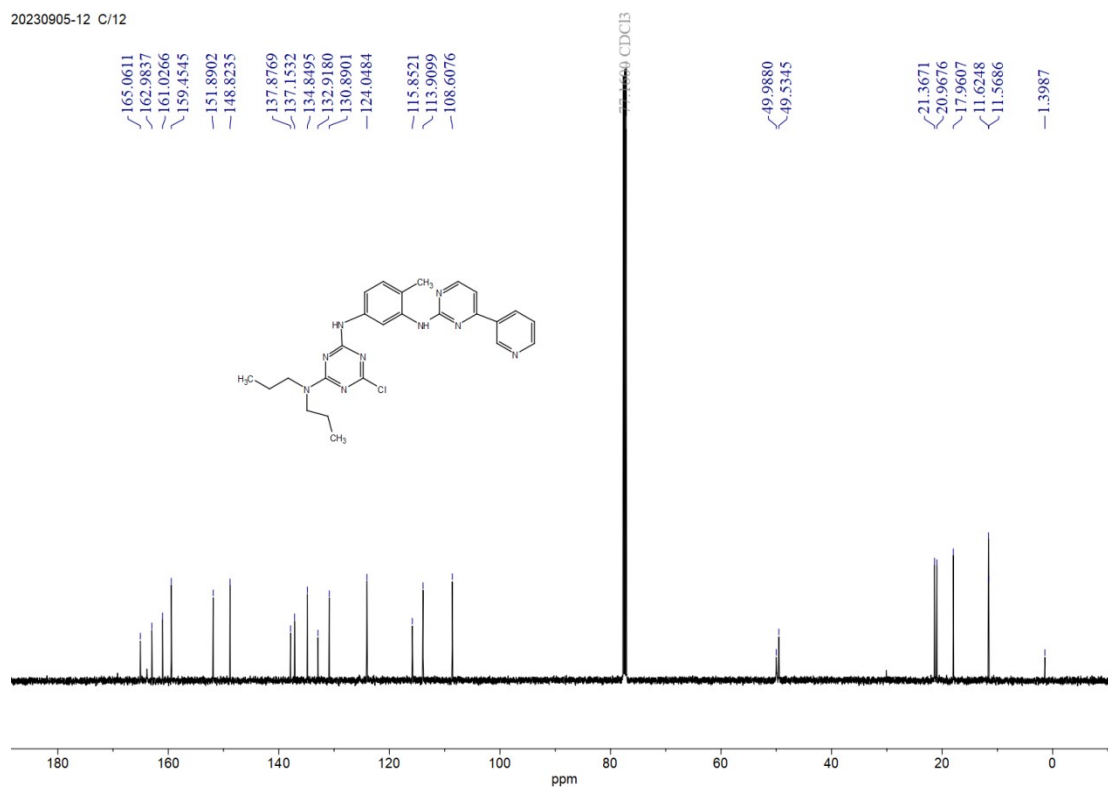

Figure 8 The  $^{13}\text{C}$  NMR spectrum of compound **4b**

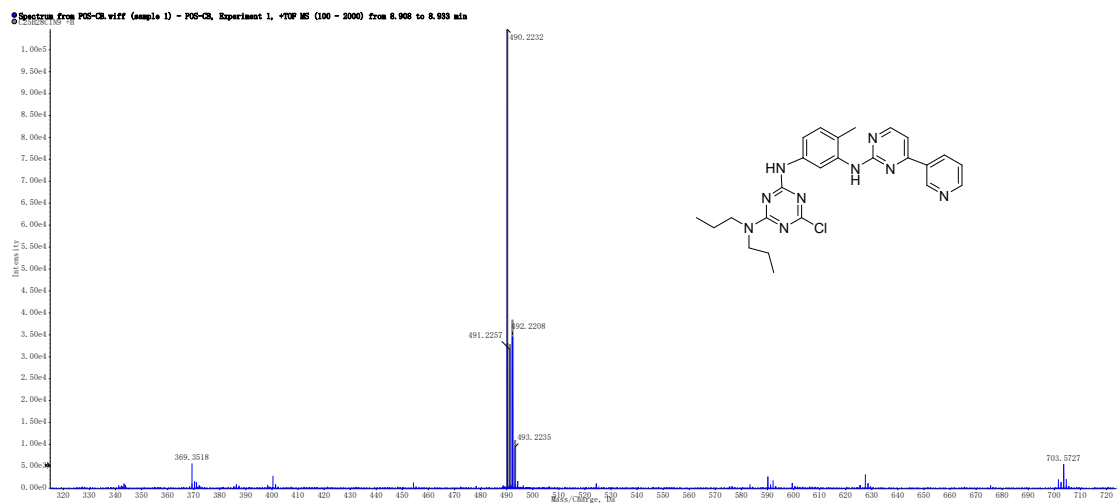

Figure 9 The HRMS spectrum of compound 4b

<色谱图>

mV

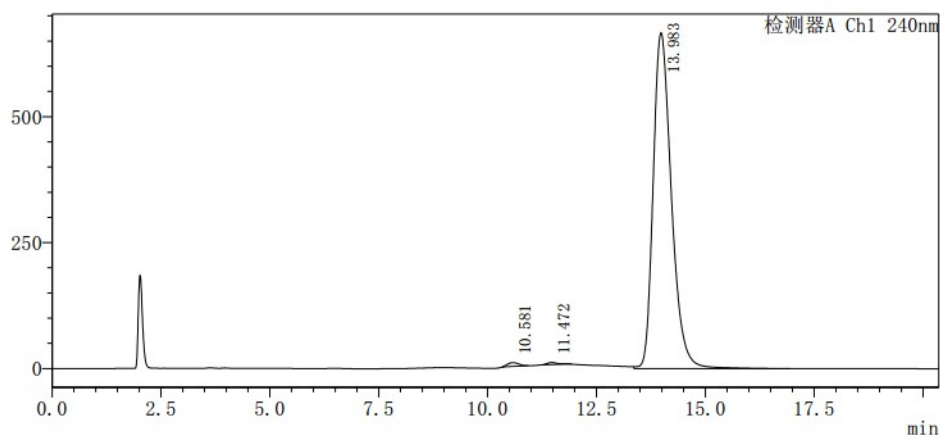

<峰表>

检测器A Ch1 240nm

| 峰号 | 保留时间   | 面积       | 高度     | 浓度     | 浓度单位 | 标记 | 化合物名 |
|----|--------|----------|--------|--------|------|----|------|
| 1  | 10.581 | 133831   | 7501   | 0.682  |      | M  |      |
| 2  | 11.472 | 74567    | 4306   | 0.380  |      | M  |      |
| 3  | 13.983 | 19407139 | 666412 | 98.938 |      | S  |      |
| 总计 |        | 19615537 | 678219 |        |      |    |      |

Figure 10 The HPLC of compound 4b



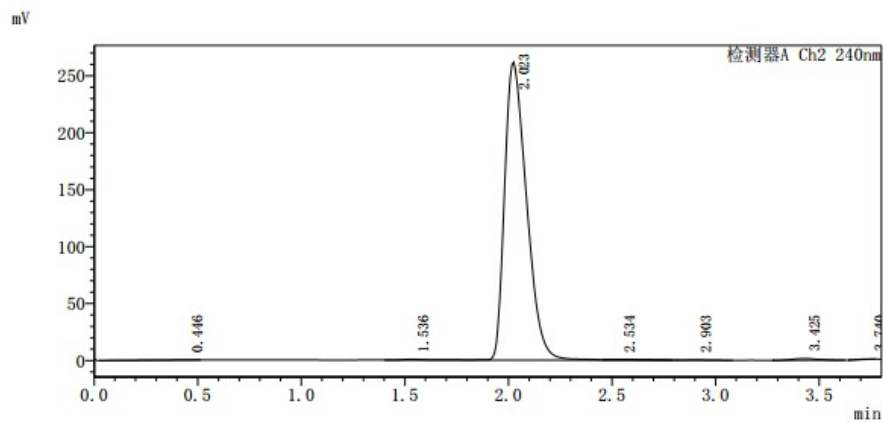

| 峰号 | 保留时间  | 面积      | 高度     | 浓度    | 浓度单位 | 标记 | 化合物名 |
|----|-------|---------|--------|-------|------|----|------|
| 1  | 0.446 | 1483    | 68     | 0.000 |      |    |      |
| 2  | 1.536 | 8648    | 733    | 0.000 |      | V  |      |
| 3  | 2.023 | 1929635 | 261661 | 0.000 |      | SV |      |
| 4  | 2.534 | 3237    | 329    | 0.000 |      | T  |      |
| 5  | 2.903 | 1623    | 183    | 0.000 |      |    |      |
| 6  | 3.425 | 13292   | 1516   | 0.000 |      |    |      |
| 7  | 3.740 | 1725    | 272    | 0.000 |      |    |      |
| 总计 |       | 1959644 | 264762 |       |      |    |      |

Figure 11 The HPLC of DMSO

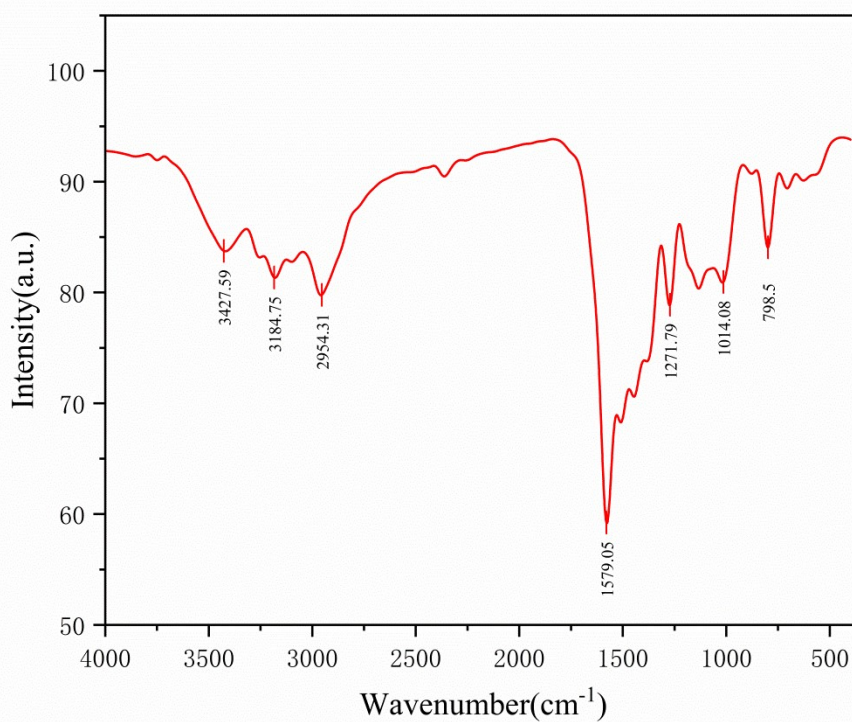

Figure 12 The IR spectrum of compound 4c

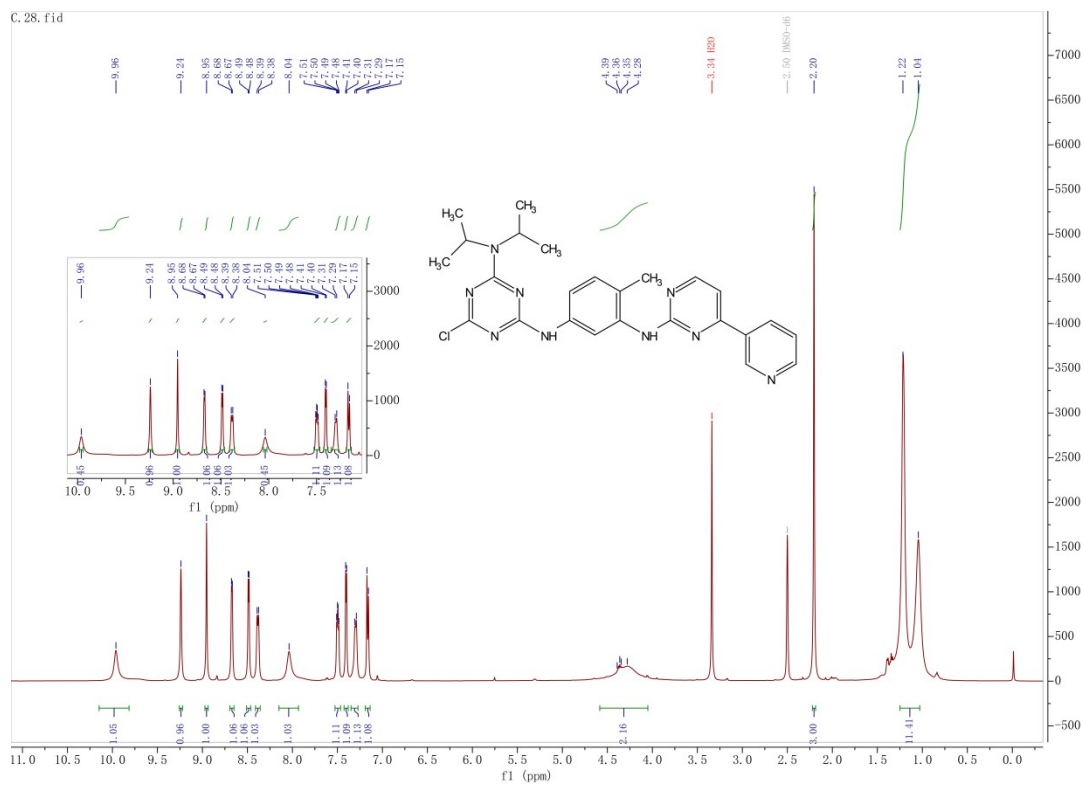

Figure 13 The  $^1\text{H}$  NMR spectrum of compound **4c**

22 C/100

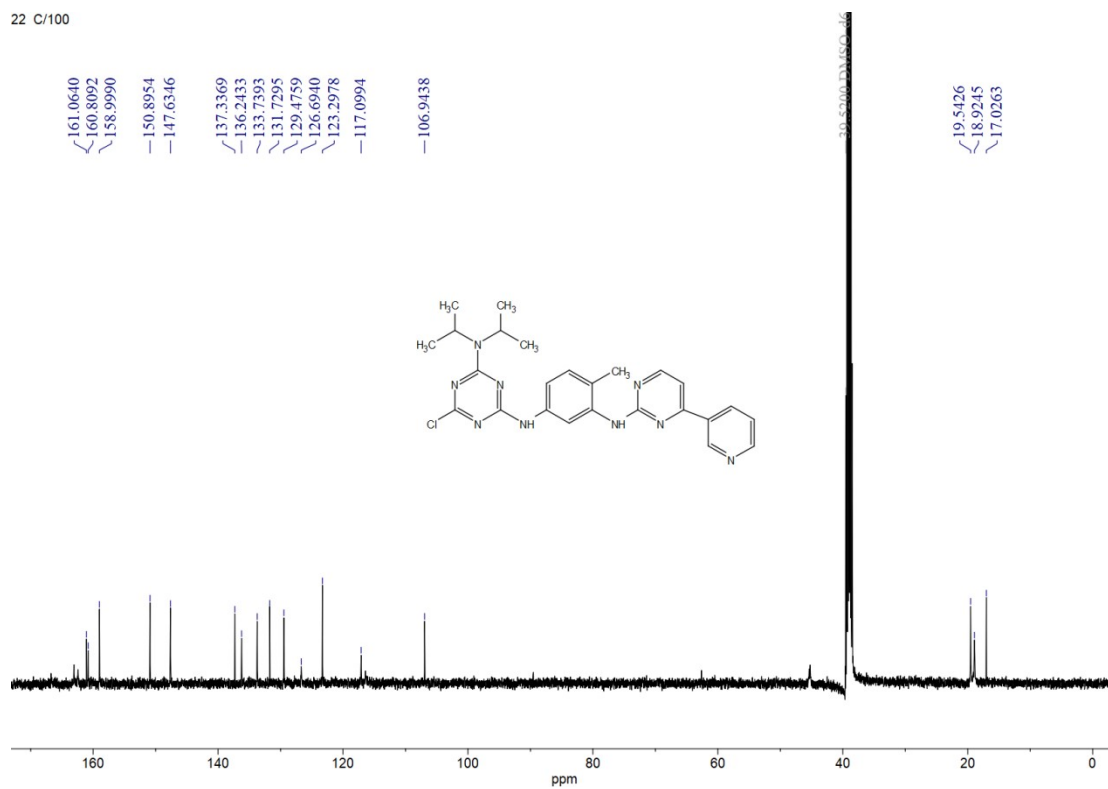

Figure 14 The  $^{13}\text{C}$  NMR spectrum of compound **4c**

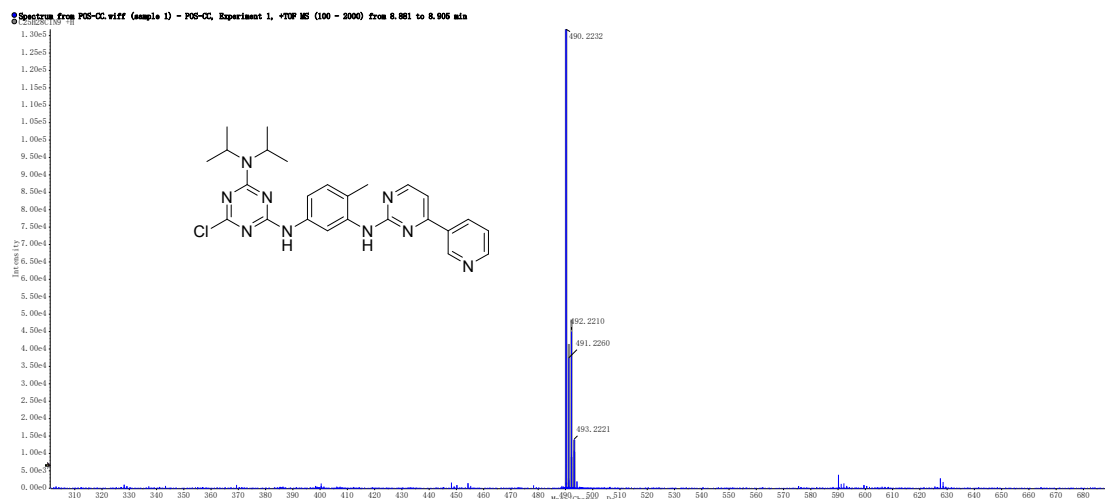

Figure 15 The HRMS spectrum of compound 4c

<色谱图>

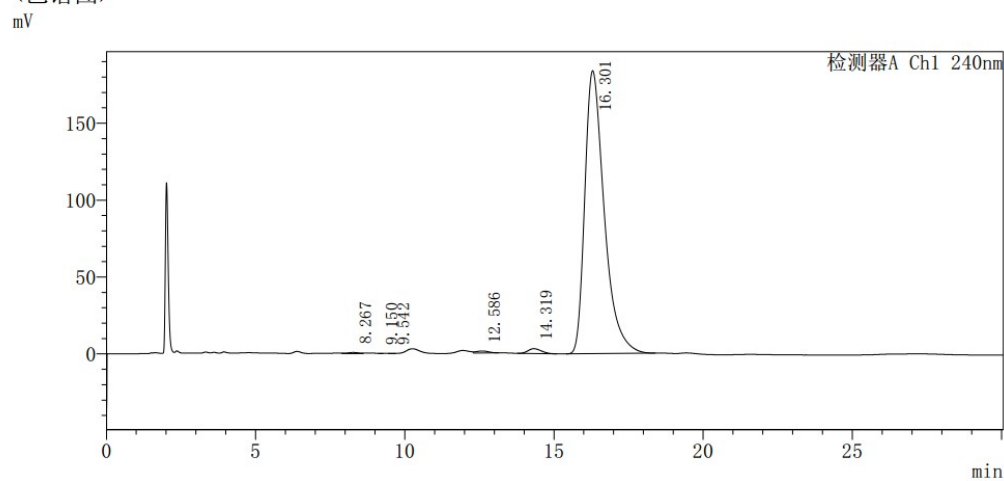

<峰表>

检测器A Ch1 240nm

| 峰号 | 保留时间   | 面积      | 高度     | 浓度     | 浓度单位 | 标记 | 化合物名 |
|----|--------|---------|--------|--------|------|----|------|
| 1  | 8.267  | 19920   | 720    | 0.235  |      |    |      |
| 2  | 9.150  | 1852    | 189    | 0.022  |      |    |      |
| 3  | 9.542  | 2357    | 169    | 0.028  |      |    |      |
| 4  | 12.586 | 40175   | 1366   | 0.474  |      |    |      |
| 5  | 14.319 | 96656   | 3150   | 1.140  |      |    |      |
| 6  | 16.301 | 8315557 | 183994 | 98.101 |      |    |      |
| 总计 |        | 8476515 | 189589 |        |      |    |      |

Figure 16 The HPLC of compound 4c

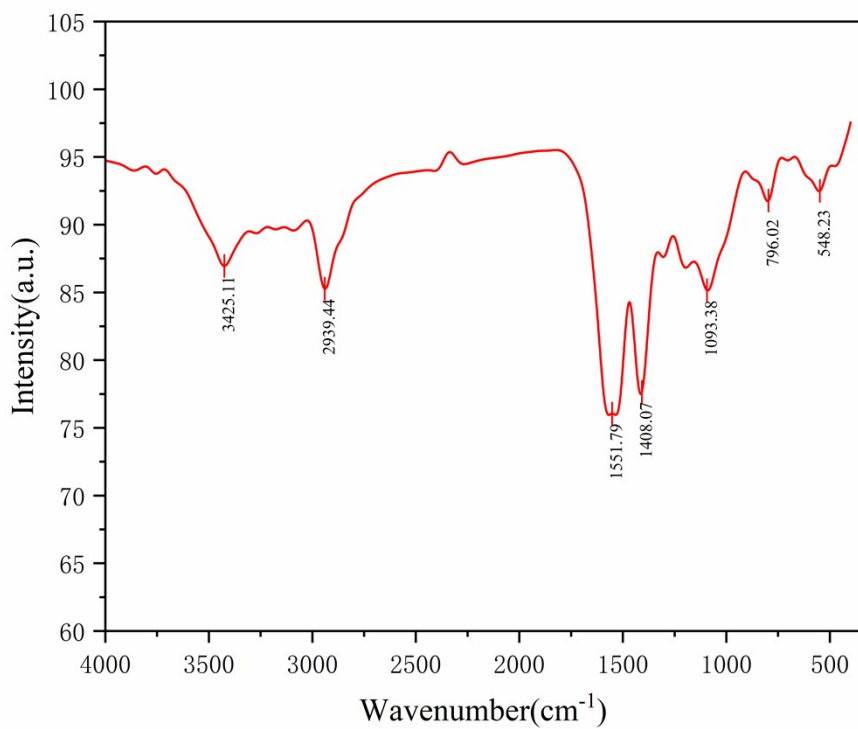

Figure 17 The IR spectrum of compound 4d

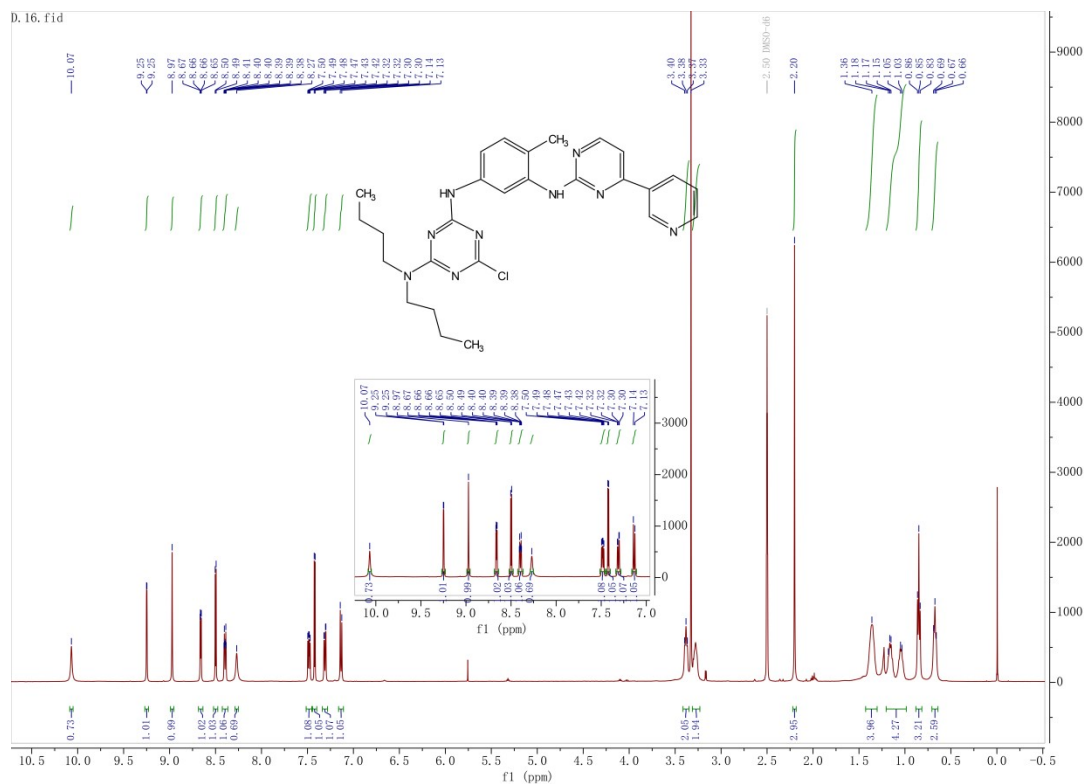

Figure 18 The <sup>1</sup>H NMR spectrum of compound 4d

05 C/11

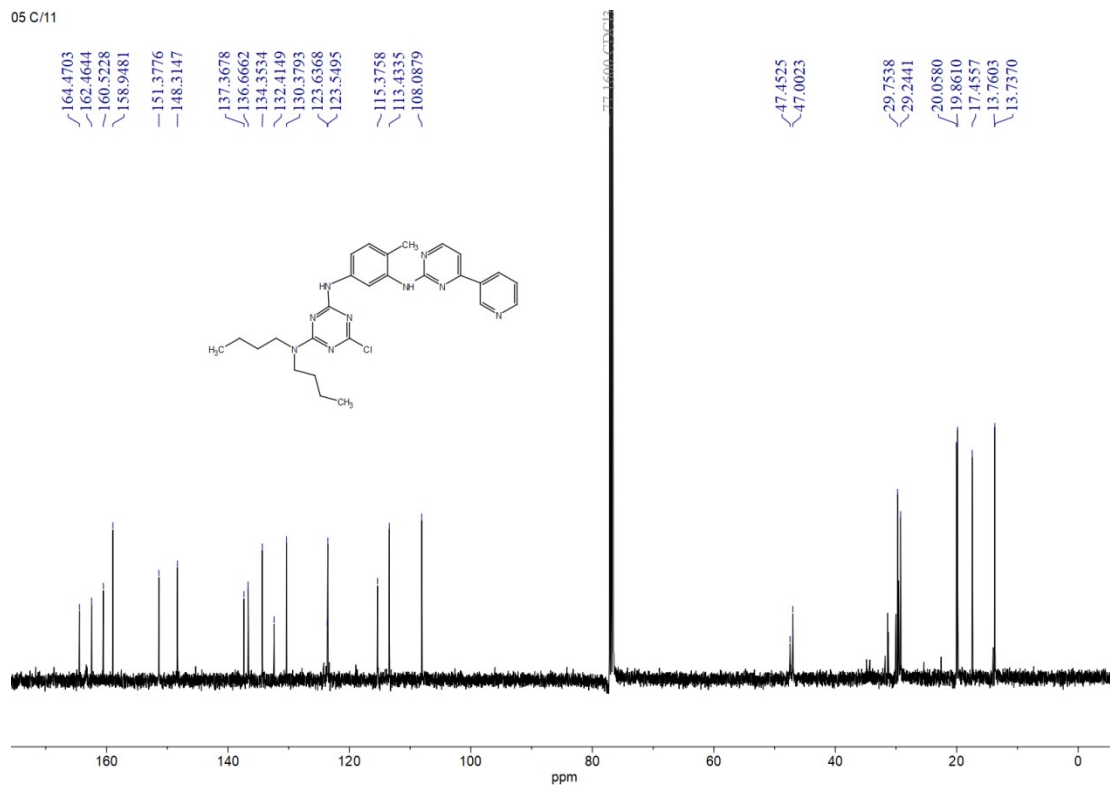

Figure 19 The <sup>13</sup>C NMR spectrum of compound 4d

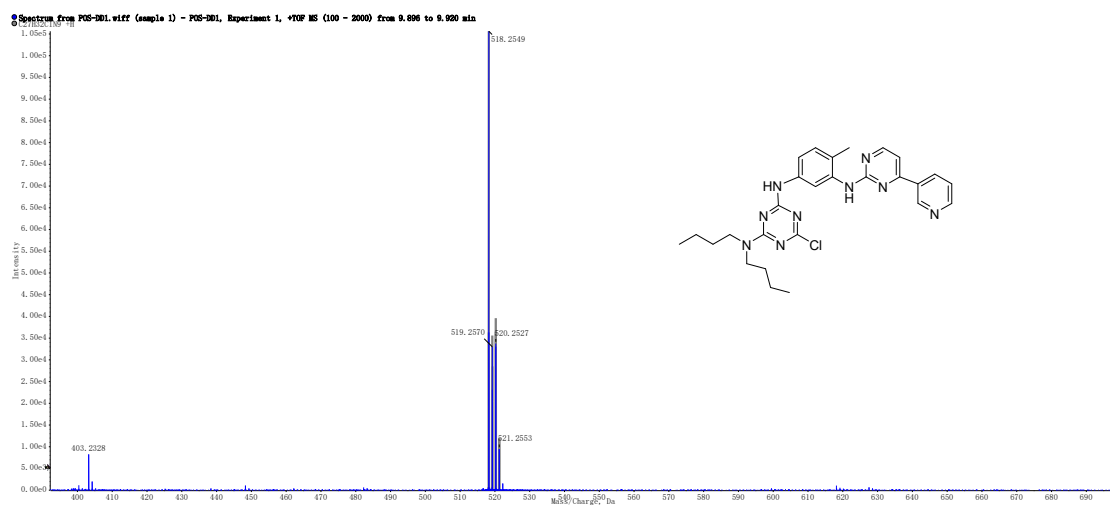

Figure 20 The HRMS spectrum of compound 4d

<色谱图>

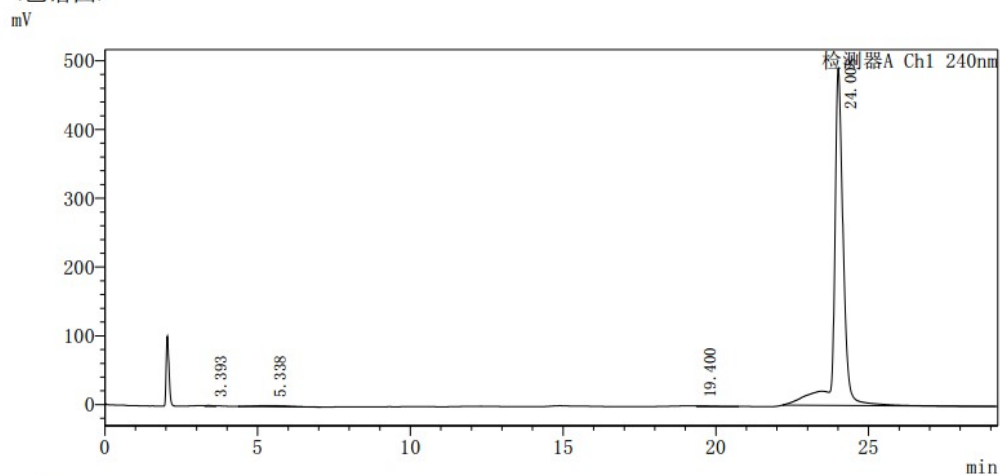

<峰表>

检测器A Ch1 240nm

| 峰号 | 保留时间   | 面积       | 高度     | 浓度     | 浓度单位 | 标记  | 化合物名 |
|----|--------|----------|--------|--------|------|-----|------|
| 1  | 3.393  | 22573    | 1330   | 0.218  |      |     |      |
| 2  | 5.338  | 115605   | 1486   | 1.117  |      |     |      |
| 3  | 19.400 | 41508    | 1058   | 0.401  |      |     |      |
| 4  | 24.008 | 10171510 | 489794 | 98.264 |      | S M |      |
| 总计 |        | 10351195 | 493668 |        |      |     |      |

Figure 21 The HPLC of compound 4d

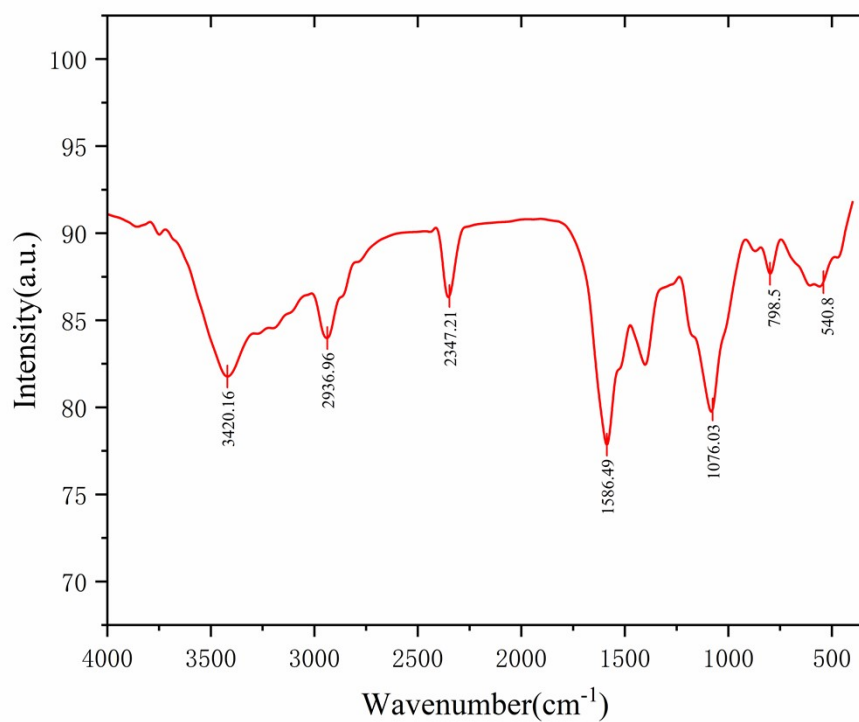

Figure 22 The IR spectrum of compound 4e

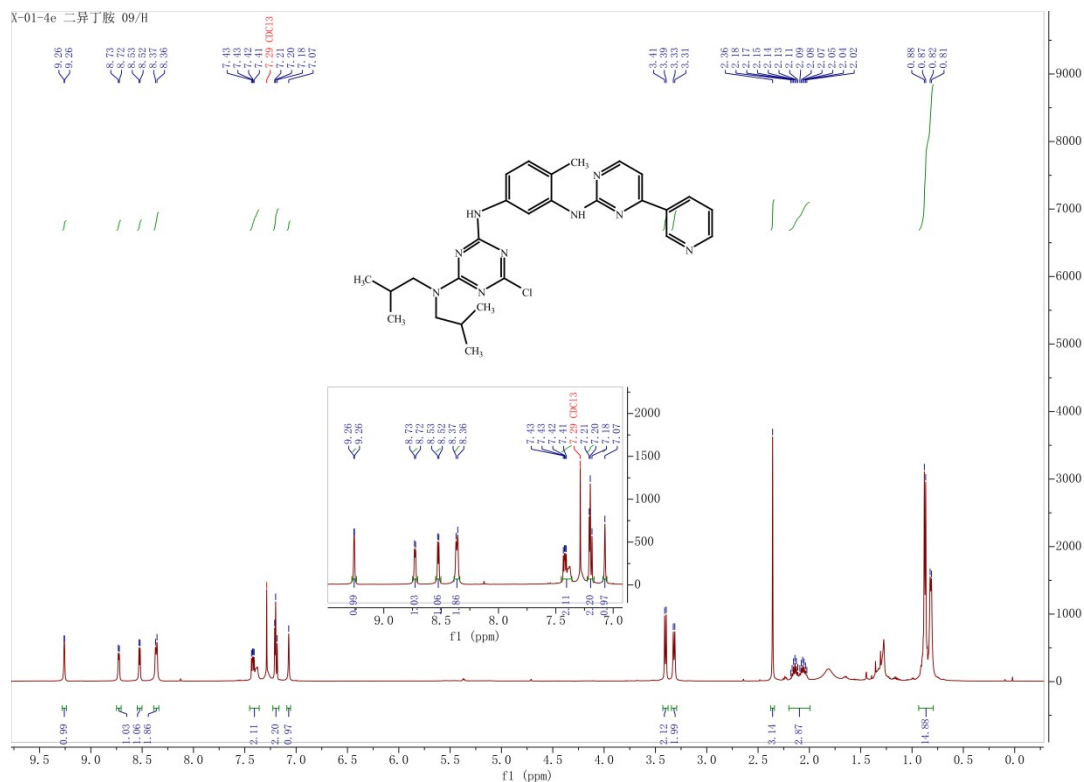

Figure 23 The  $^1\text{H}$  NMR spectrum of compound 4e

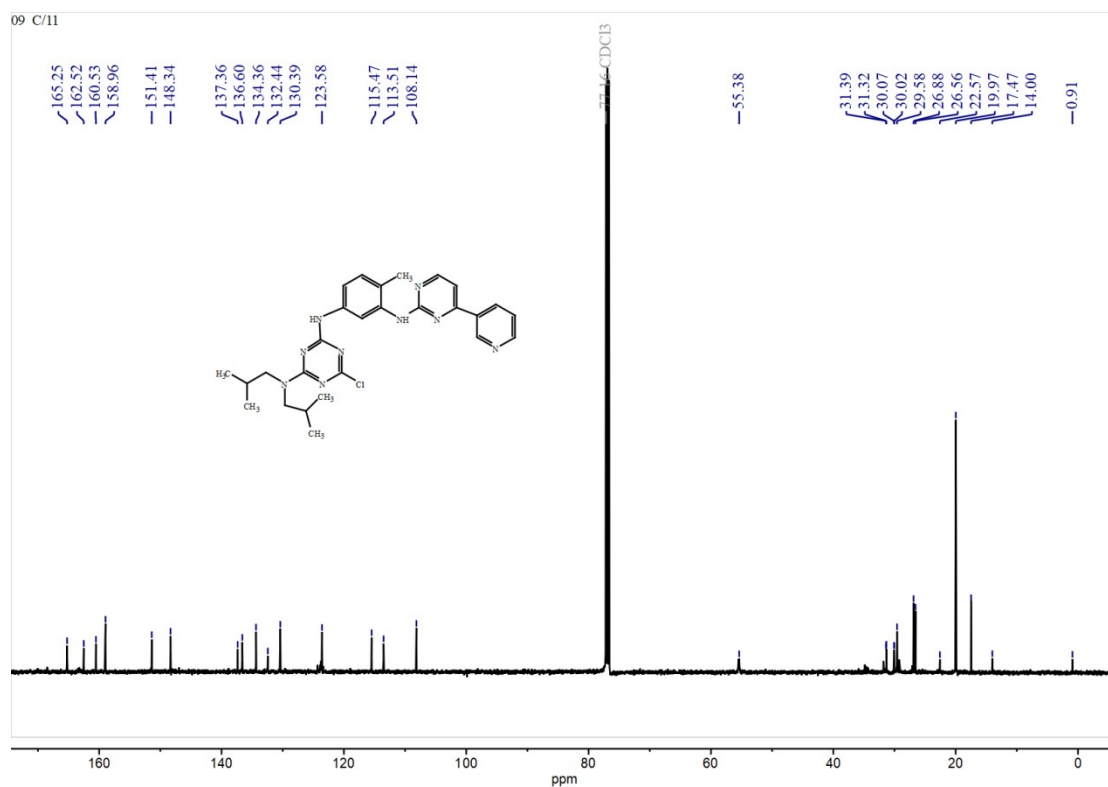

Figure 24 The  $^{13}\text{C}$  NMR spectrum of compound 4e

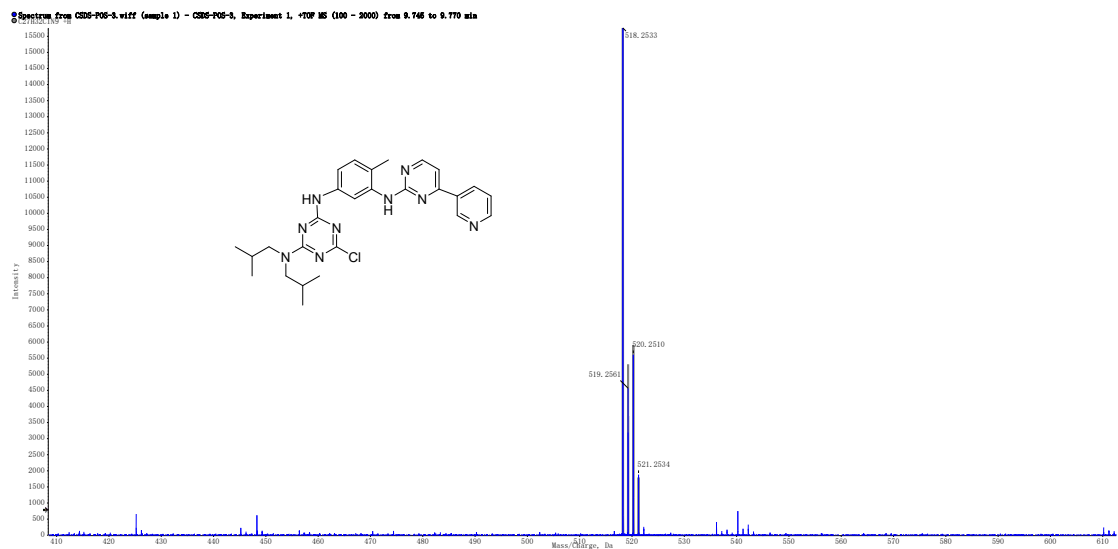

Figure 25 The HRMS spectrum of compound 4e

<色谱图>

mV

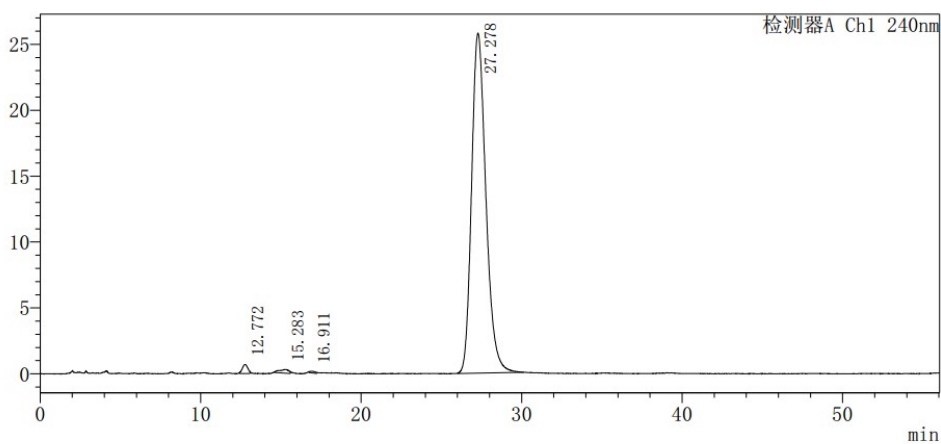

<峰表>

检测器A Ch1 240nm

| 峰号 | 保留时间   | 面积      | 高度    | 浓度     | 浓度单位 | 标记 | 化合物名 |
|----|--------|---------|-------|--------|------|----|------|
| 1  | 12.772 | 15728   | 681   | 0.966  |      | M  |      |
| 2  | 15.283 | 11090   | 279   | 0.681  |      | M  |      |
| 3  | 16.911 | 2824    | 120   | 0.173  |      | M  |      |
| 4  | 27.278 | 1598611 | 25793 | 98.180 |      | SV |      |
| 总计 |        | 1628253 | 26873 |        |      |    |      |

Figure 26 The HPLC of compound 4e



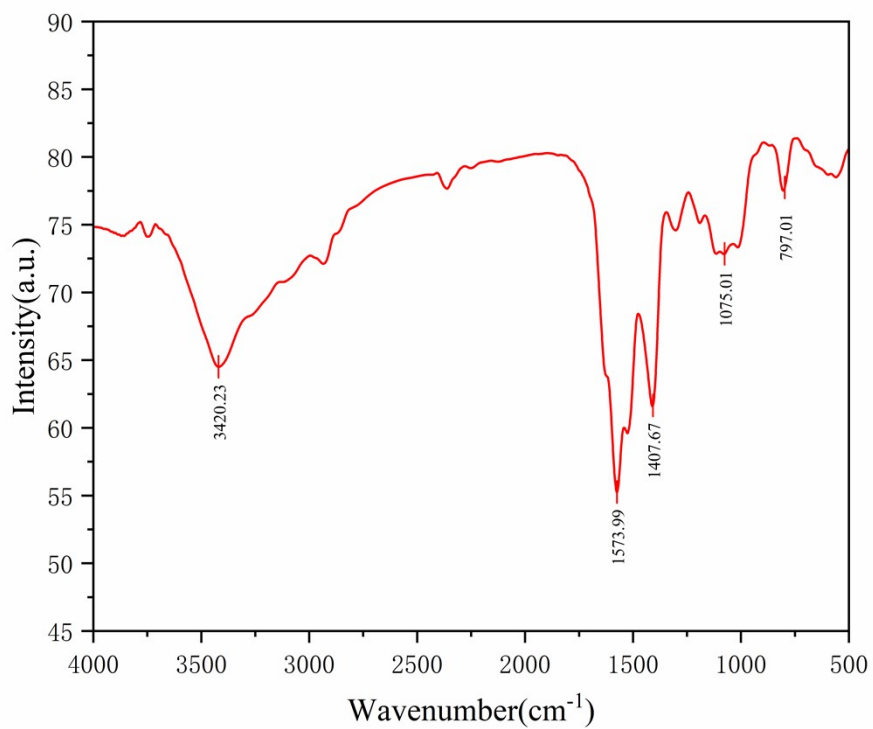

Figure 27 The IR spectrum of compound 4f

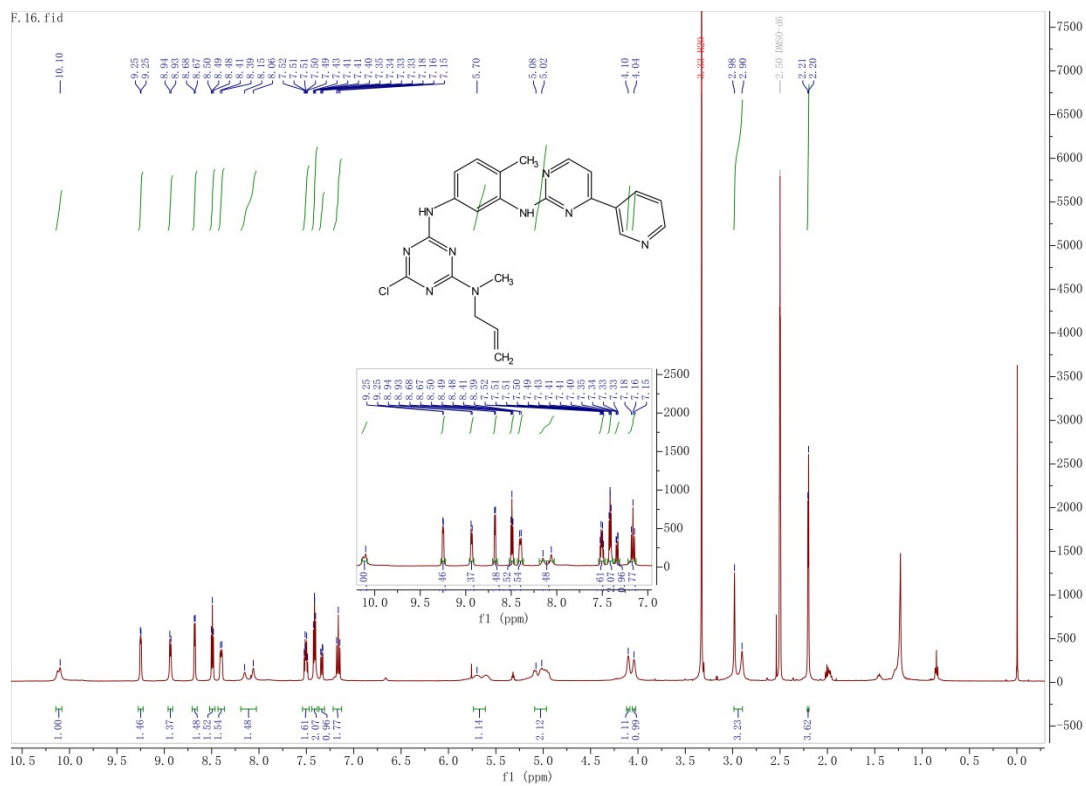

Figure 28 The <sup>1</sup>H NMR spectrum of compound 4f

X-01-4fN-甲基烯丙基胺 24/108

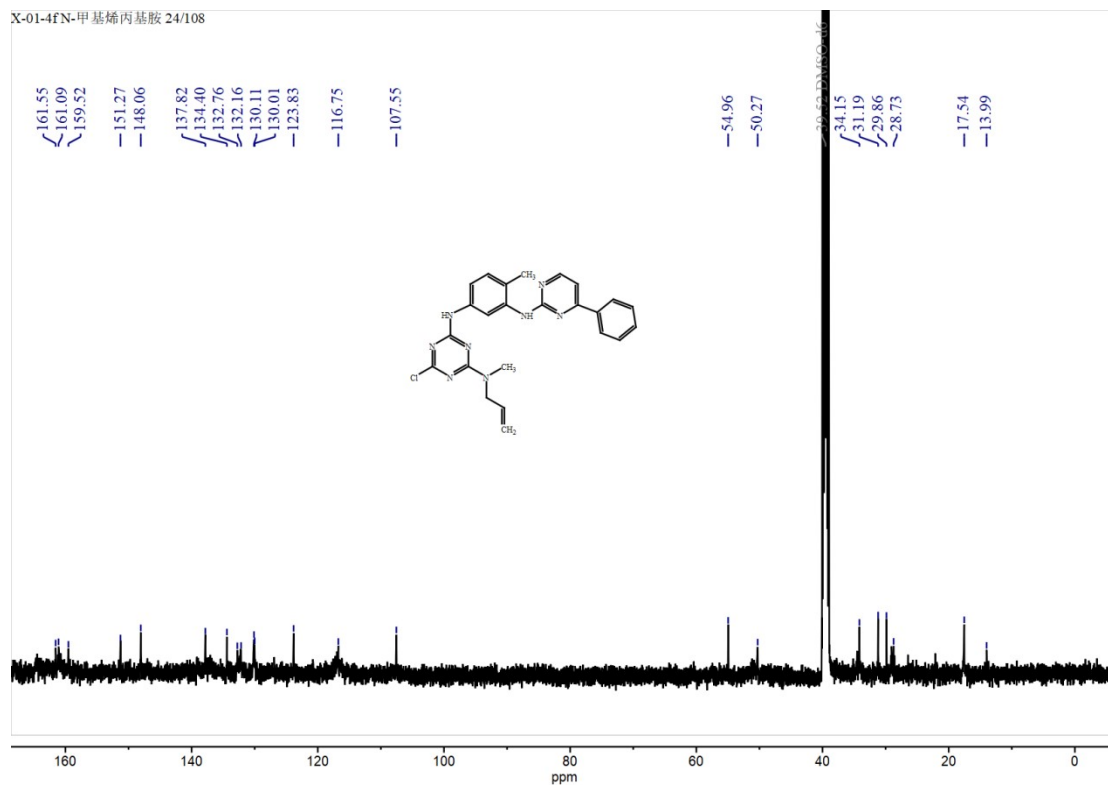

Figure 29 The  $^{13}\text{C}$  NMR spectrum of compound 4f

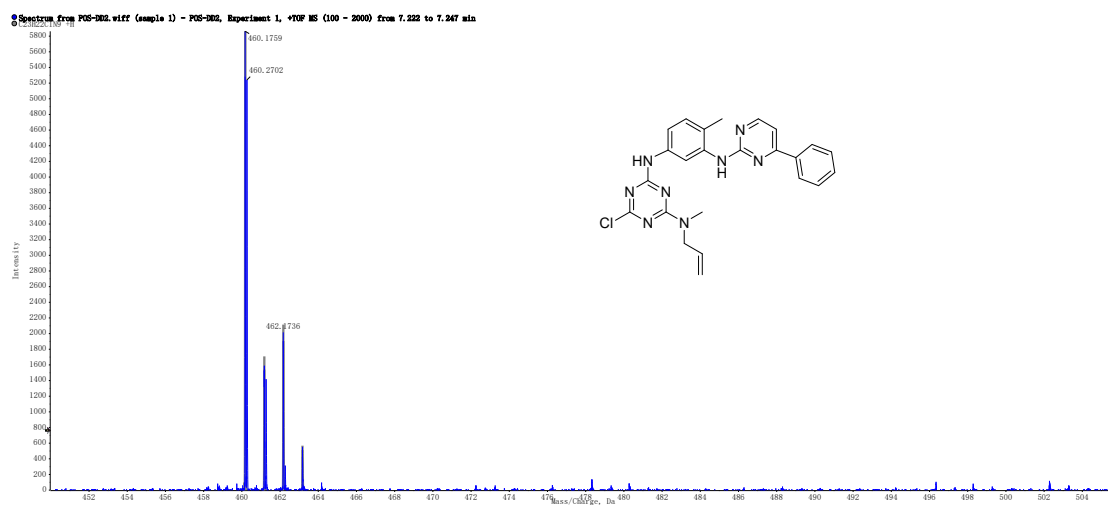

Figure 30 The HRMS spectrum of compound 4f

<色谱图>

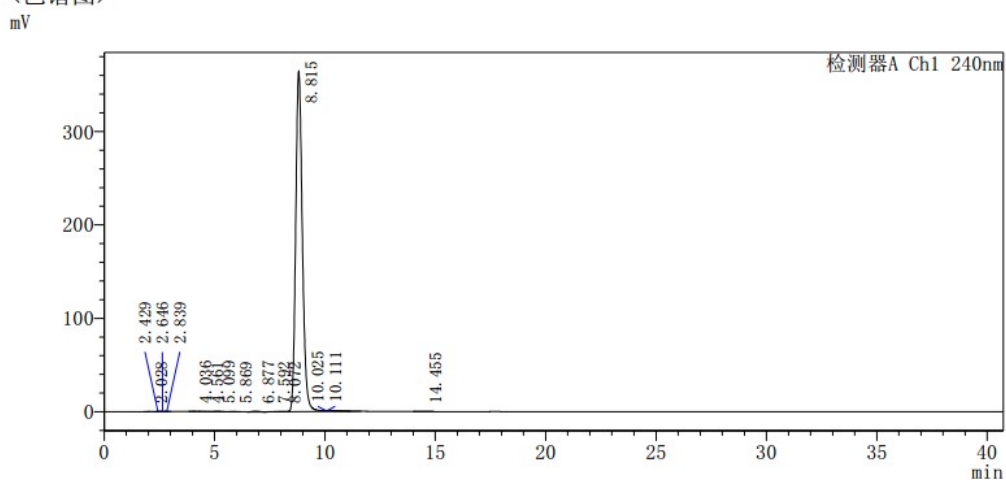

<峰表>

| 峰号 | 保留时间   | 面积      | 高度     | 浓度    | 浓度单位 | 标记 | 化合物名 |
|----|--------|---------|--------|-------|------|----|------|
| 1  | 2.028  | 1792    | 190    | 0.000 |      |    |      |
| 2  | 2.429  | 2299    | 272    | 0.000 |      | V  |      |
| 3  | 2.646  | 1221    | 116    | 0.000 |      | V  |      |
| 4  | 2.839  | 1177    | 159    | 0.000 |      | V  |      |
| 5  | 4.036  | 2750    | 281    | 0.000 |      |    |      |
| 6  | 4.561  | 5413    | 257    | 0.000 |      |    |      |
| 7  | 5.099  | 11777   | 519    | 0.000 |      | V  |      |
| 8  | 5.869  | 3048    | 262    | 0.000 |      |    |      |
| 9  | 6.877  | 15631   | 714    | 0.000 |      |    |      |
| 10 | 7.592  | 2238    | 135    | 0.000 |      |    |      |
| 11 | 8.072  | 8062    | 370    | 0.000 |      | V  |      |
| 12 | 8.815  | 7682331 | 364233 | 0.000 |      | SV |      |
| 13 | 10.025 | 1258    | 168    | 0.000 |      | T  |      |
| 14 | 10.111 | 7706    | 231    | 0.000 |      | TV |      |
| 15 | 14.455 | 3484    | 121    | 0.000 |      |    |      |
| 总计 |        | 7750187 | 368027 |       |      |    |      |

Figure 31 The HPLC of compound 4f

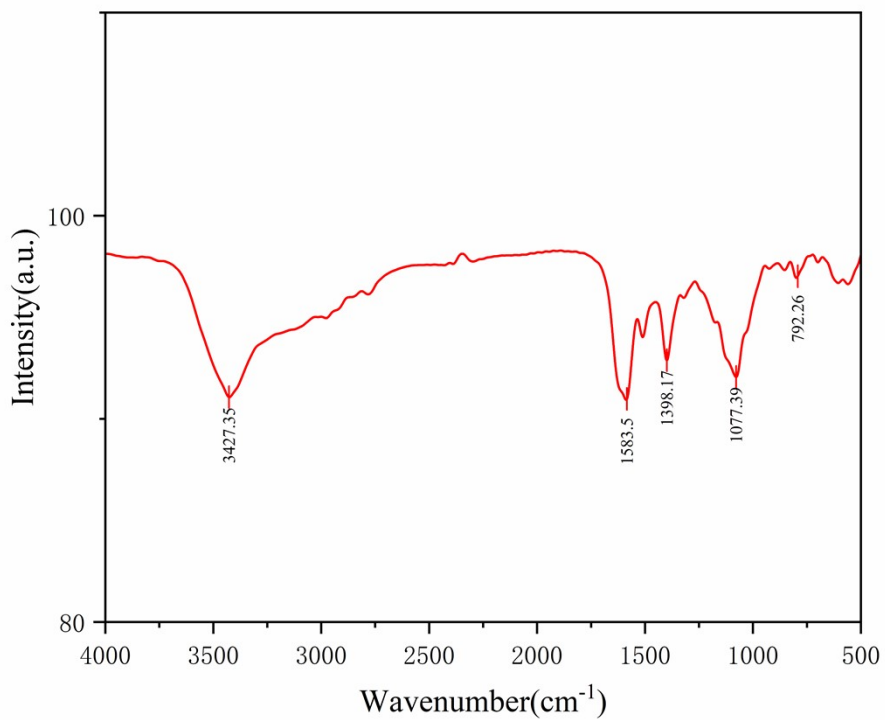

Figure 32 The IR spectrum of compound 4g

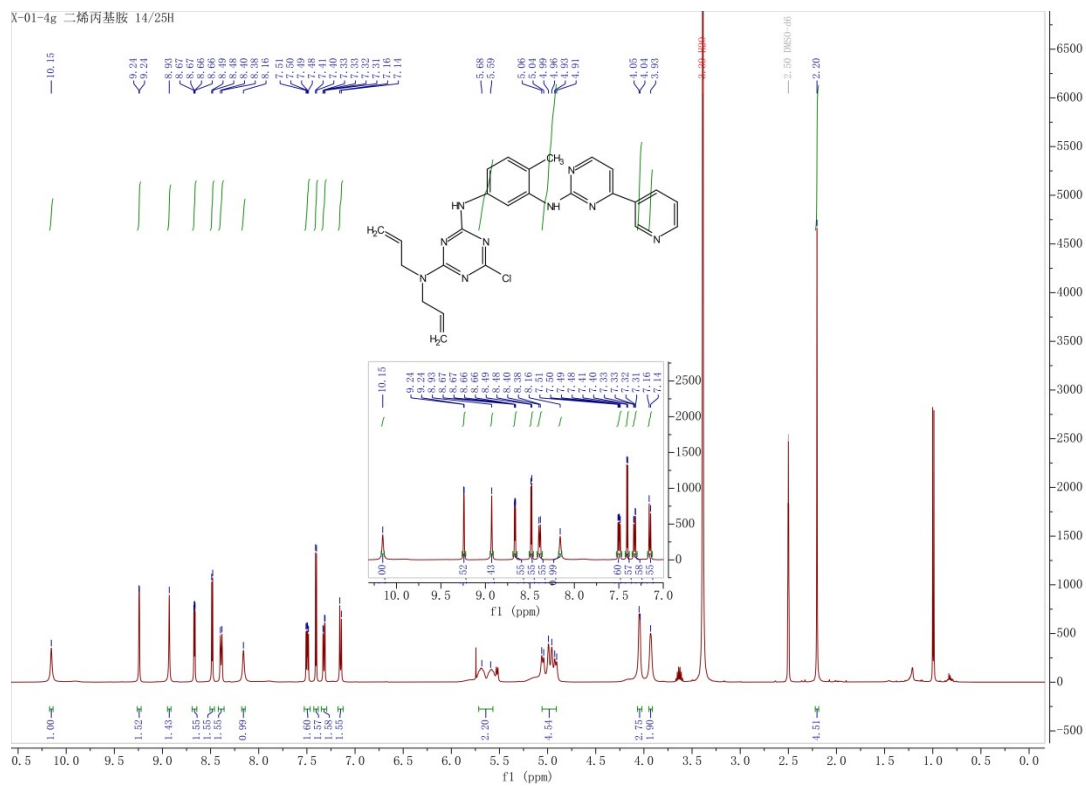

Figure 33 The <sup>1</sup>H NMR spectrum of compound 4g

X-01-4g 二烯丙基胺 14/C

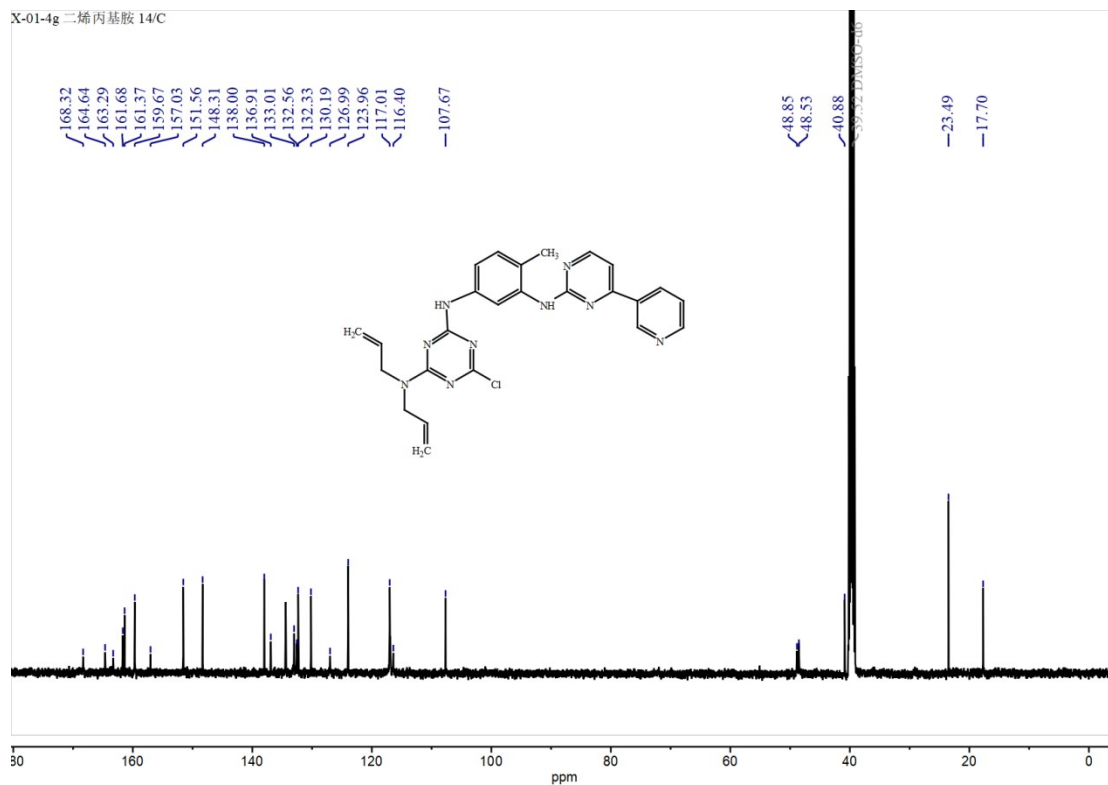

Figure 34 The <sup>1</sup>H NMR spectrum of compound 4g

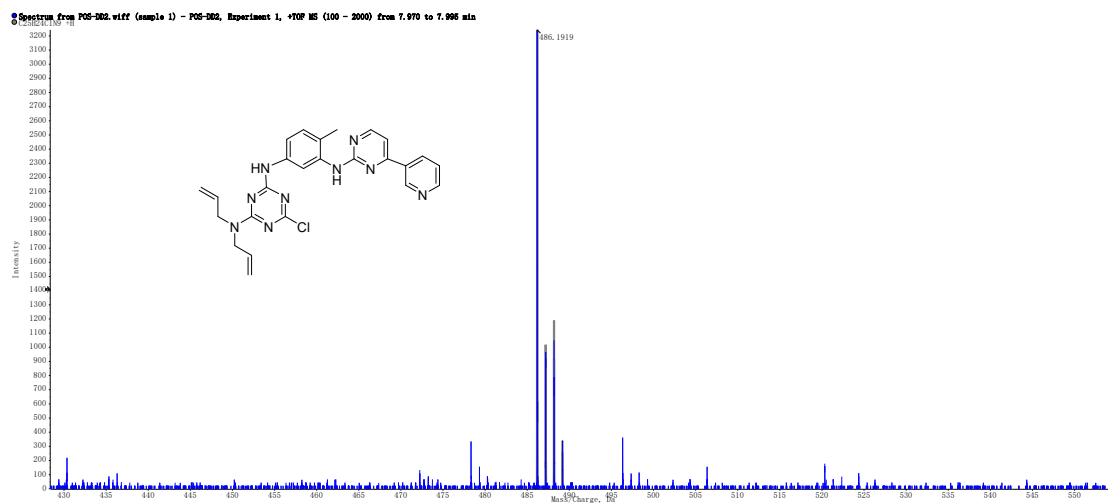

Figure 35 The HRMS spectrum of compound 4g

<色谱图>

mV

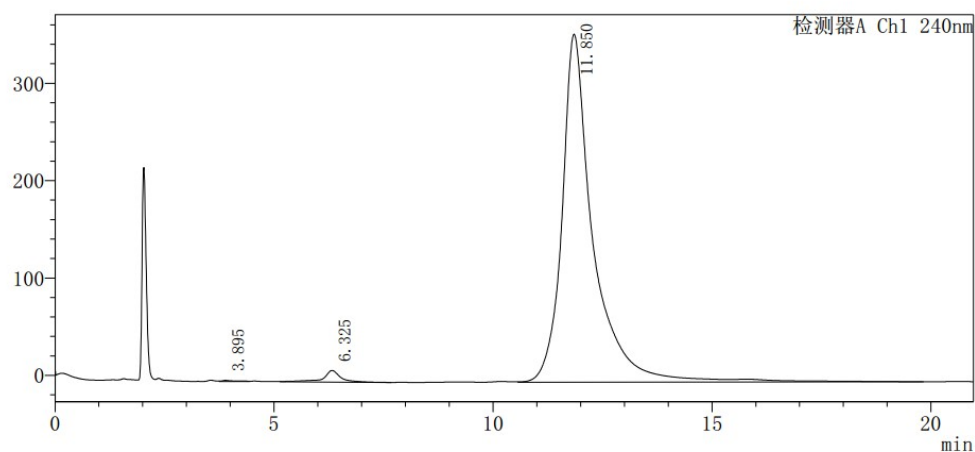

<峰表>

检测器A Ch1 240nm

| 峰号 | 保留时间   | 面积       | 高度     | 浓度     | 浓度单位 | 标记 | 化合物名 |
|----|--------|----------|--------|--------|------|----|------|
| 1  | 3.895  | 28350    | 1221   | 0.157  |      |    |      |
| 2  | 6.325  | 326513   | 11851  | 1.808  |      | V  |      |
| 3  | 11.850 | 17708448 | 357481 | 98.035 |      | S  |      |
| 总计 |        | 18063311 | 370553 |        |      |    |      |

Figure 36 The HPLC of compound 4g

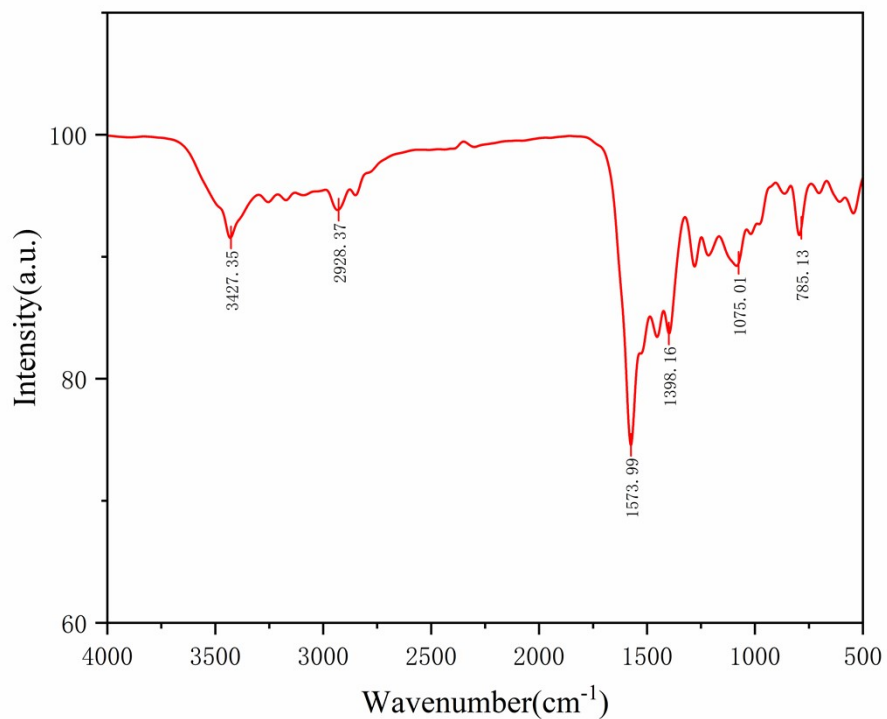

Figure 37 The IR spectrum of compound 4h

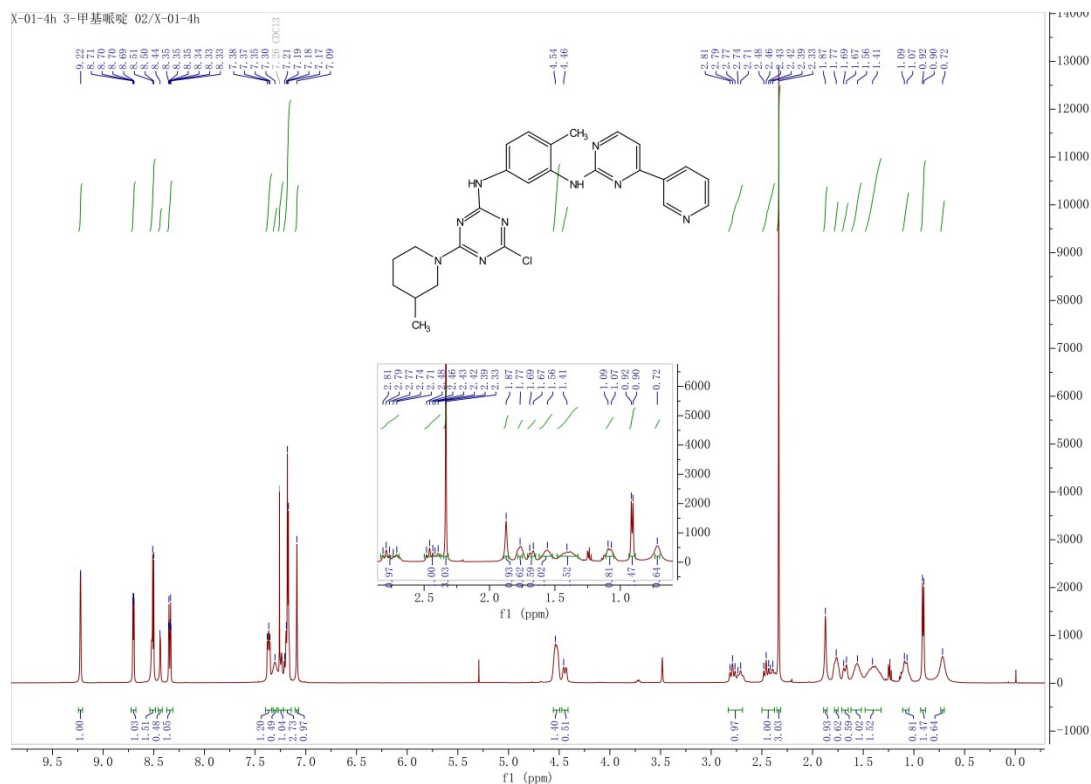

Figure 38 The <sup>1</sup>H NMR spectrum of compound 4h

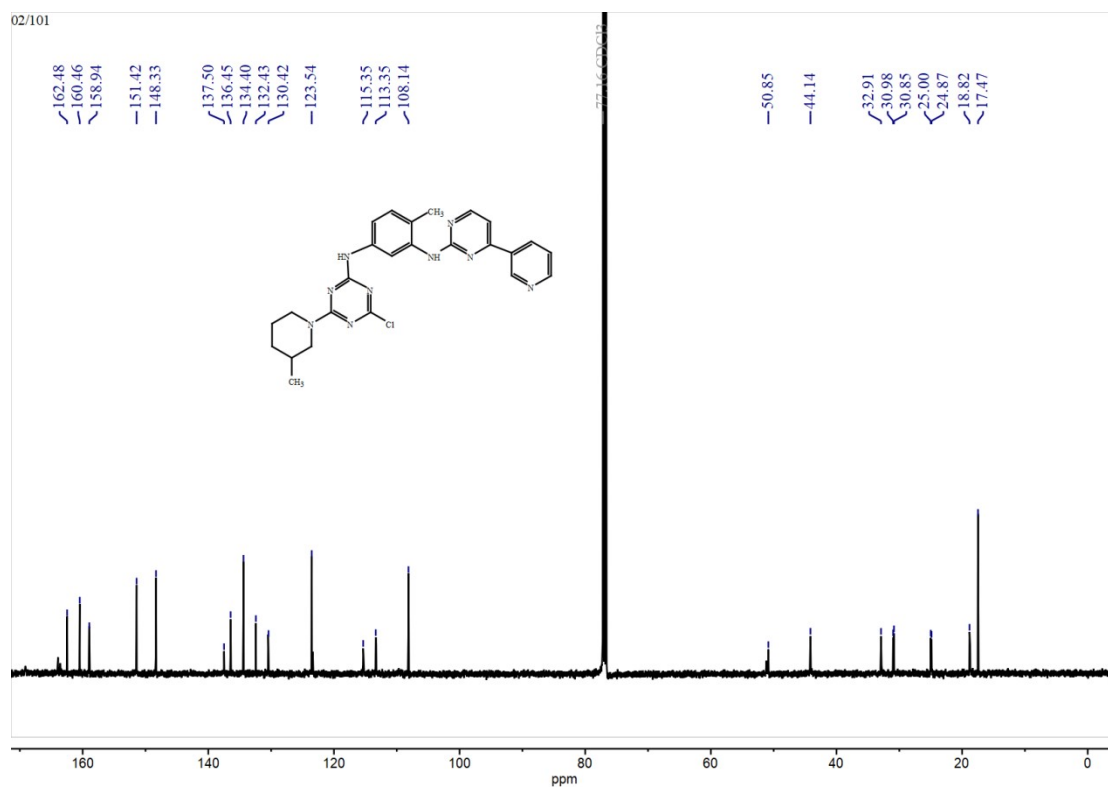

Figure 39 The <sup>13</sup>C NMR spectrum of compound 4h

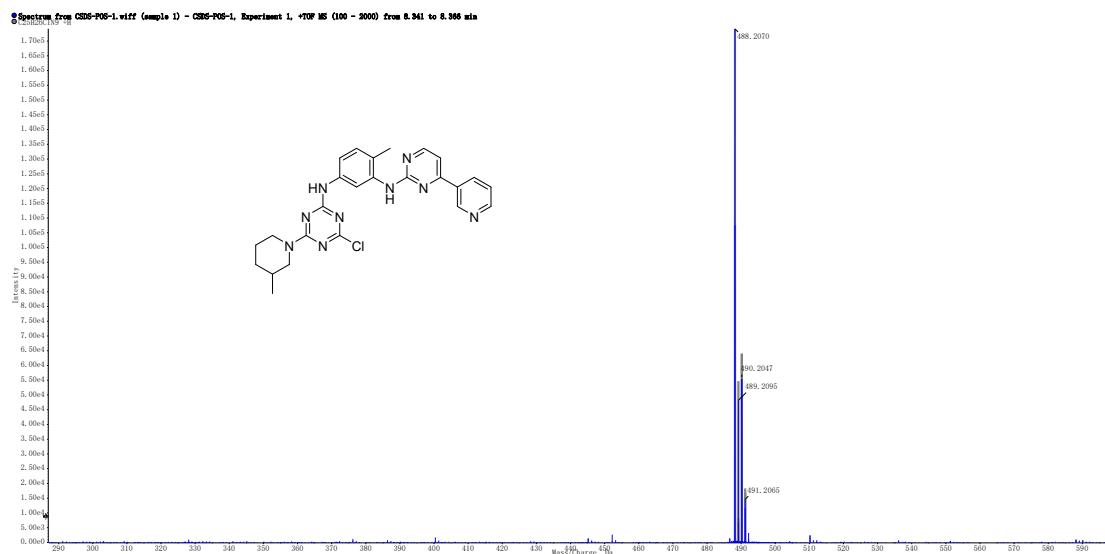

Figure 40 The HRMS spectrum of compound 4h

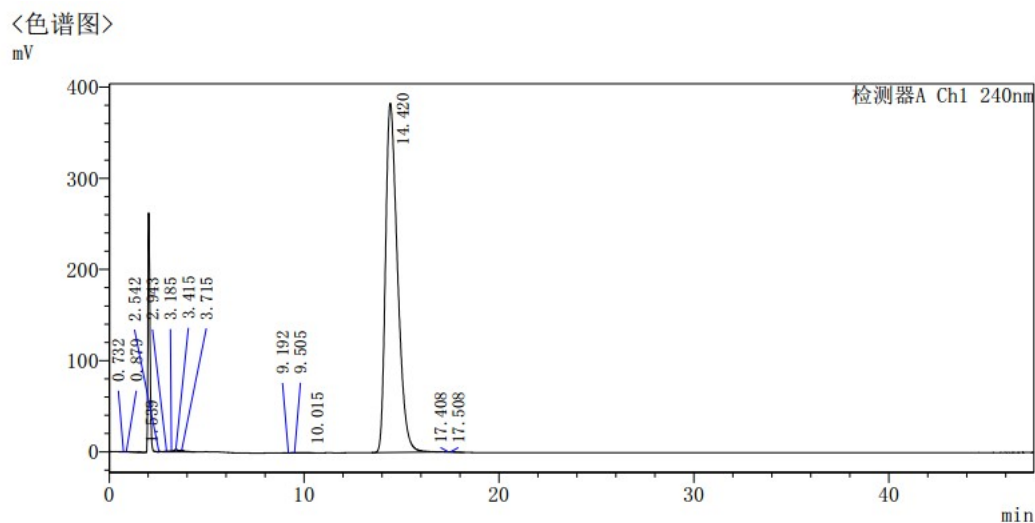

<峰表>

检测器A Ch1 240nm

| 峰号 | 保留时间   | 面积       | 高度     | 浓度     | 浓度单位 | 标记 | 化合物名 |
|----|--------|----------|--------|--------|------|----|------|
| 1  | 0.732  | 6985     | 417    | 0.042  |      |    |      |
| 2  | 0.879  | 8665     | 458    | 0.052  |      | V  |      |
| 3  | 1.539  | 3599     | 586    | 0.022  |      |    |      |
| 4  | 2.542  | 2119     | 394    | 0.013  |      |    |      |
| 5  | 2.943  | 10715    | 761    | 0.065  |      |    |      |
| 6  | 3.185  | 13859    | 1094   | 0.084  |      | V  |      |
| 7  | 3.415  | 36440    | 2633   | 0.221  |      | V  |      |
| 8  | 3.715  | 32185    | 1901   | 0.195  |      | V  |      |
| 9  | 9.192  | 2332     | 126    | 0.014  |      | V  |      |
| 10 | 9.505  | 4371     | 230    | 0.026  |      | V  |      |
| 11 | 10.015 | 10027    | 324    | 0.061  |      | V  |      |
| 12 | 14.420 | 16370717 | 383076 | 99.166 |      |    |      |
| 13 | 17.408 | 2040     | 169    | 0.012  |      |    |      |
| 14 | 17.508 | 4326     | 202    | 0.026  |      | V  |      |
| 总计 |        | 16508381 | 392369 |        |      |    |      |

Figure 41 The HPLC of compound 4h



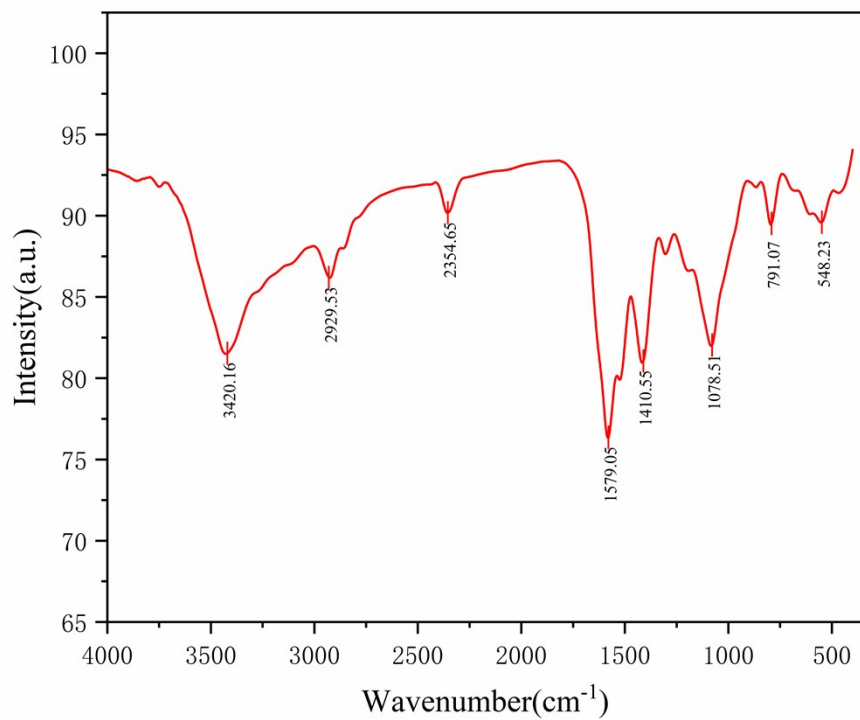

Figure 42 The IR spectrum of compound 4i

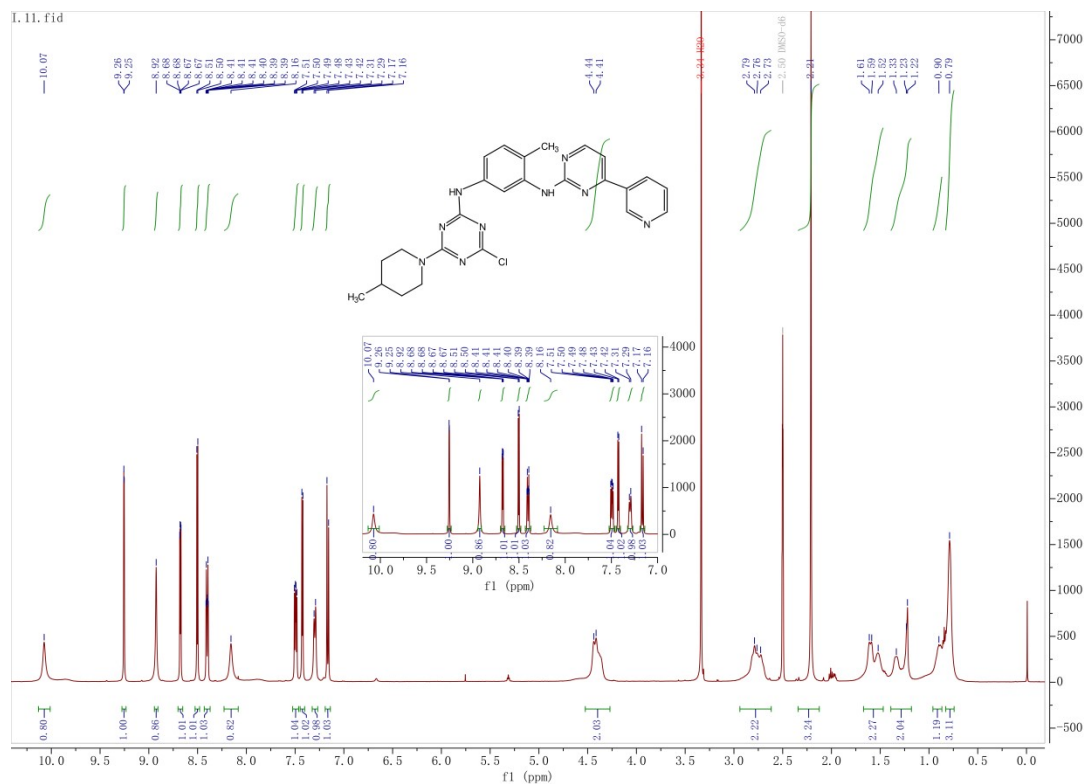

Figure 43 The <sup>1</sup>H NMR spectrum of compound 4i

20230905-13 C/10

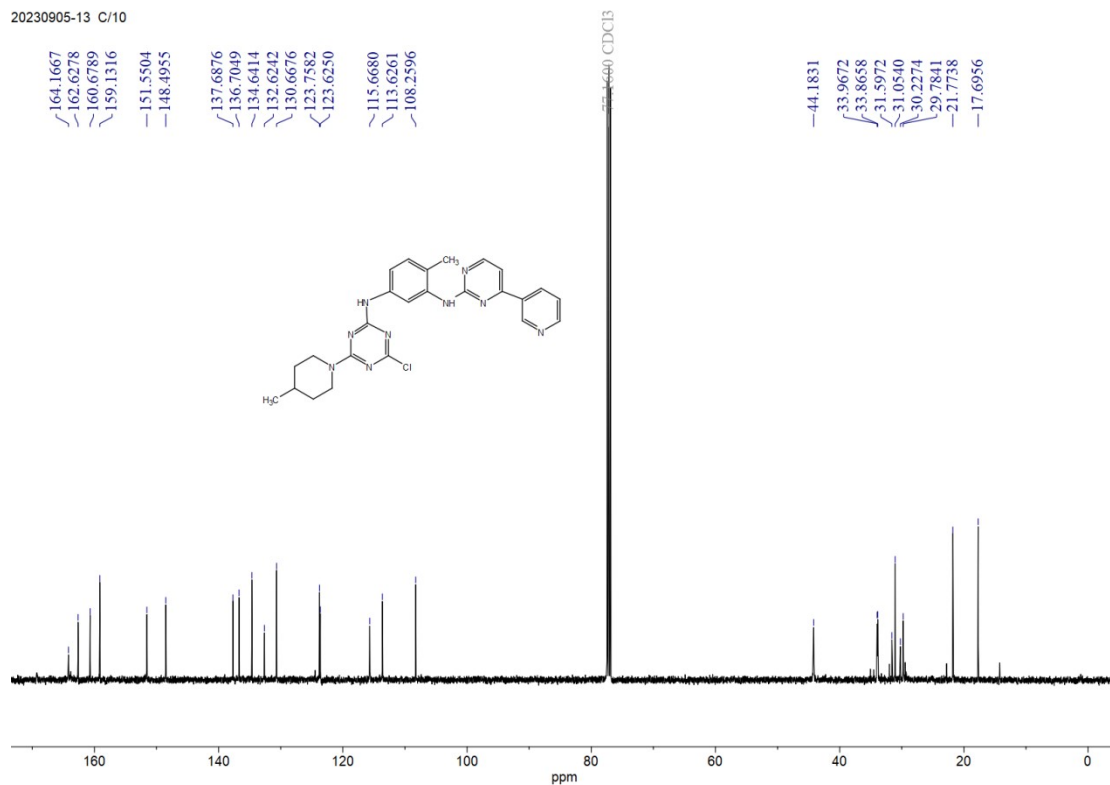

Figure 44 The <sup>13</sup>C NMR spectrum of compound 4i

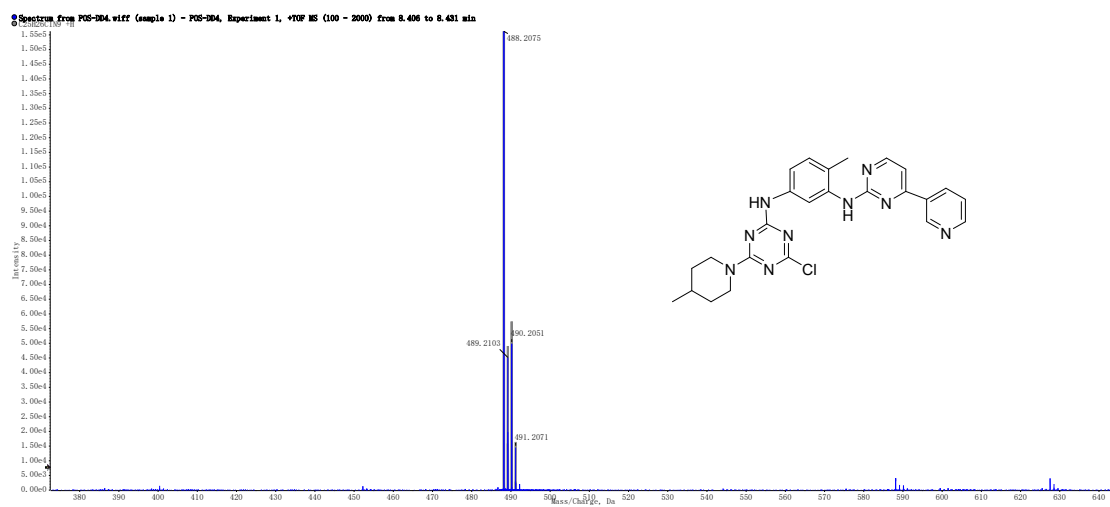

Figure 45 The HRMS spectrum of compound 4i

<色谱图>

mV

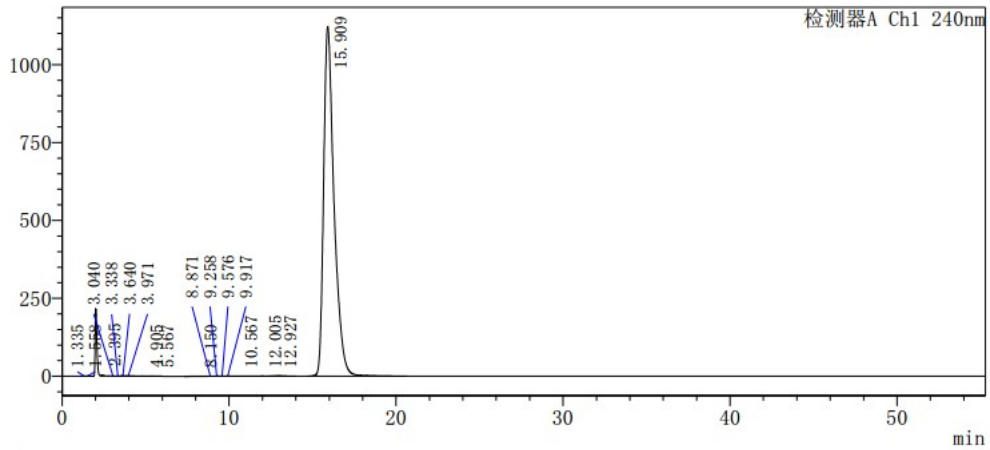

<峰表>

检测器A Ch1 240nm

| 峰号 | 保留时间   | 面积       | 高度      | 浓度     | 浓度单位 | 标记 | 化合物名 |
|----|--------|----------|---------|--------|------|----|------|
| 1  | 1.335  | 2012     | 149     | 0.004  |      | V  |      |
| 2  | 1.558  | 14652    | 1308    | 0.030  |      | V  |      |
| 3  | 2.395  | 16585    | 2581    | 0.034  |      |    |      |
| 4  | 3.040  | 1898     | 191     | 0.004  |      | V  |      |
| 5  | 3.338  | 1054     | 128     | 0.002  |      |    |      |
| 6  | 3.640  | 19910    | 1723    | 0.041  |      | V  |      |
| 7  | 3.971  | 24990    | 996     | 0.051  |      | V  |      |
| 8  | 4.905  | 9865     | 376     | 0.020  |      | V  |      |
| 9  | 5.567  | 3354     | 116     | 0.007  |      | V  |      |
| 10 | 8.150  | 19687    | 549     | 0.040  |      | V  |      |
| 11 | 8.871  | 13525    | 426     | 0.028  |      | V  |      |
| 12 | 9.258  | 1088     | 245     | 0.002  |      | V  |      |
| 13 | 9.576  | 11898    | 431     | 0.024  |      | V  |      |
| 14 | 9.917  | 1107     | 247     | 0.002  |      | V  |      |
| 15 | 10.567 | 26285    | 575     | 0.054  |      | V  |      |
| 16 | 12.005 | 21041    | 586     | 0.043  |      | V  |      |
| 17 | 12.927 | 62339    | 1518    | 0.127  |      | V  |      |
| 18 | 15.909 | 48644225 | 1120991 | 99.486 |      | SV |      |
| 总计 |        | 48895516 | 1133136 |        |      |    |      |

Figure 46 The HPLC of compound 4i

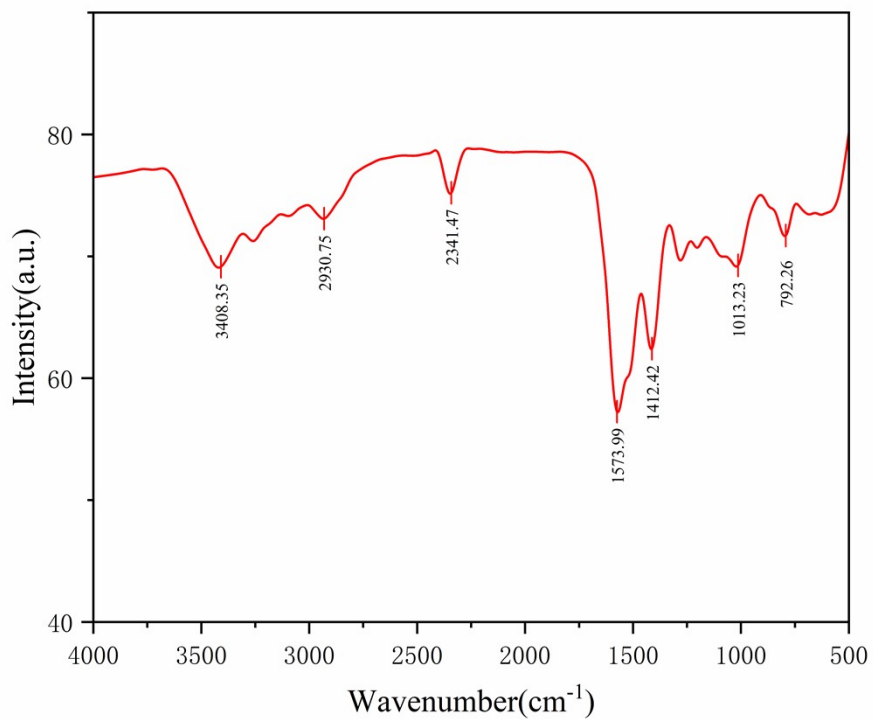

Figure 47 The IR spectrum of compound **4j**

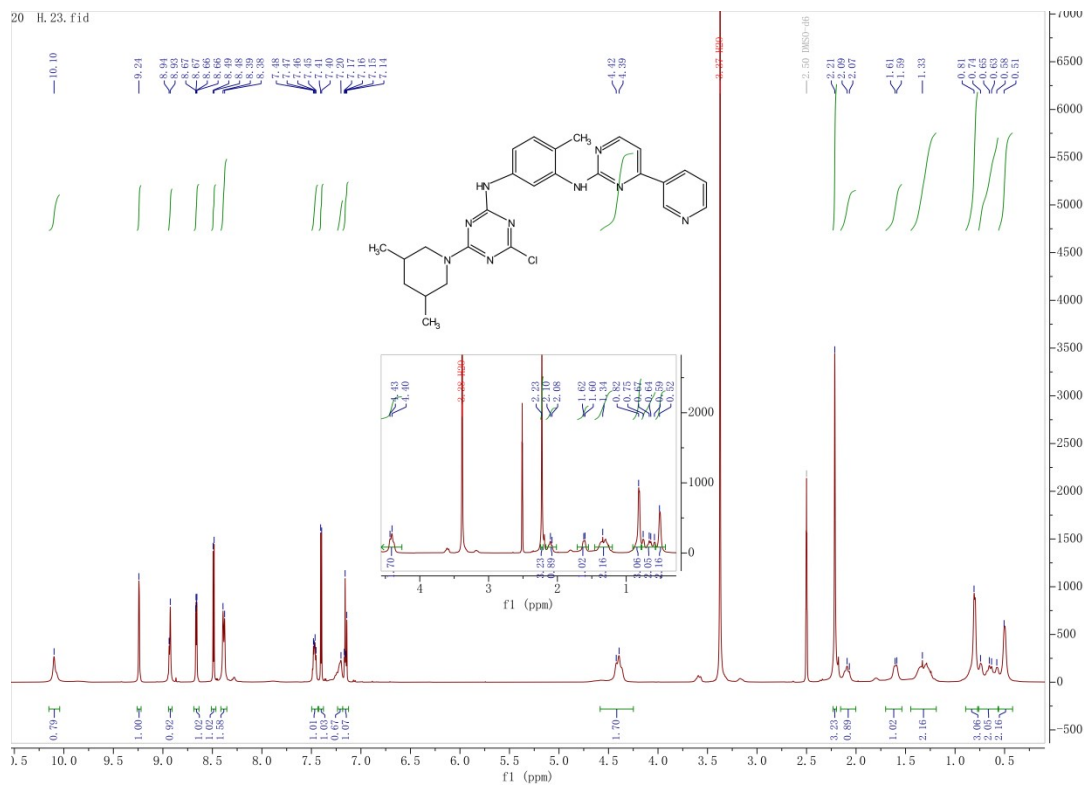

Figure 48 The <sup>1</sup>H NMR spectrum of compound **4j**

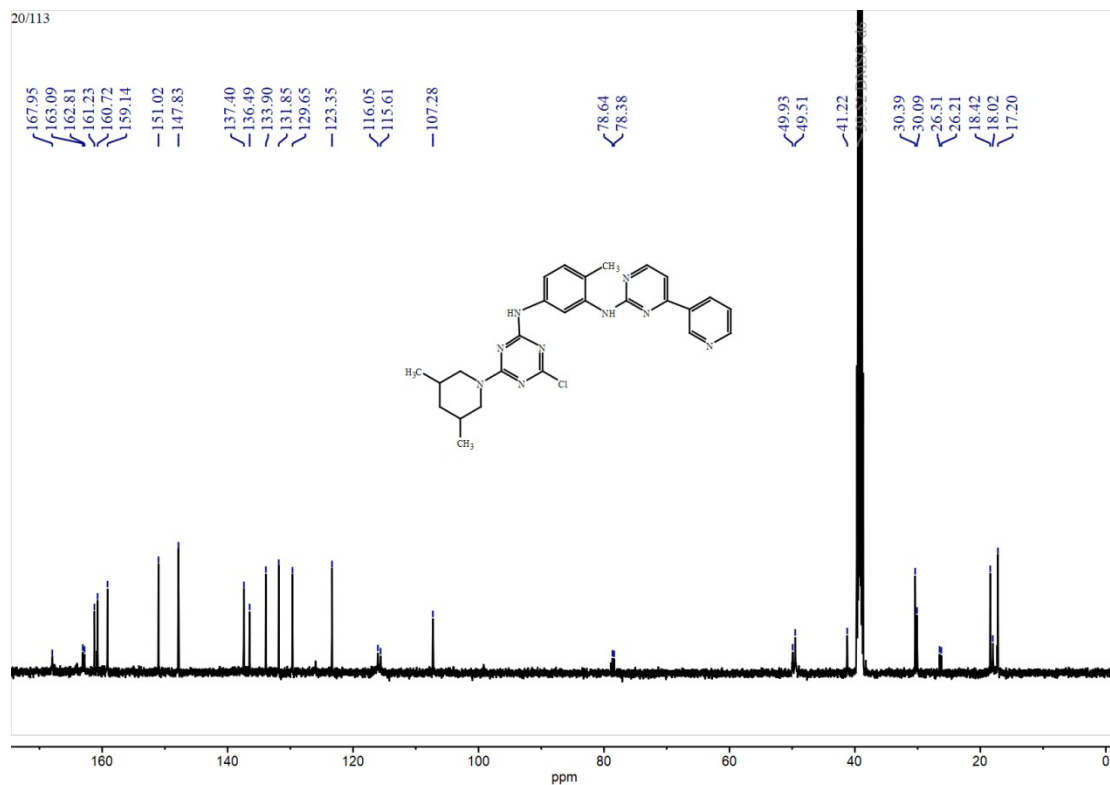

Figure 49 The  $^{13}\text{C}$  NMR spectrum of compound **4j**

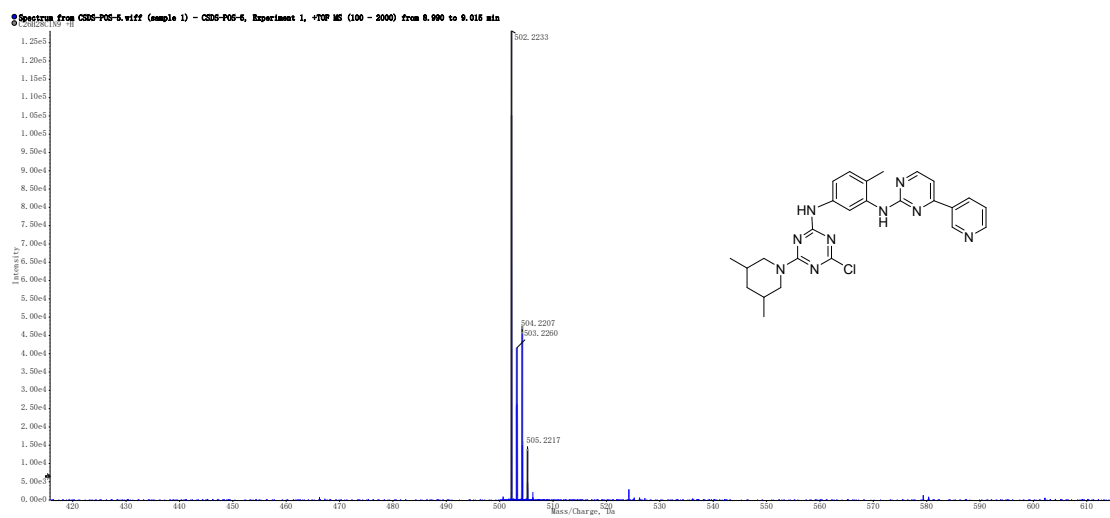

Figure 50 The HRMS spectrum of compound **4j**

<色谱图>

mV

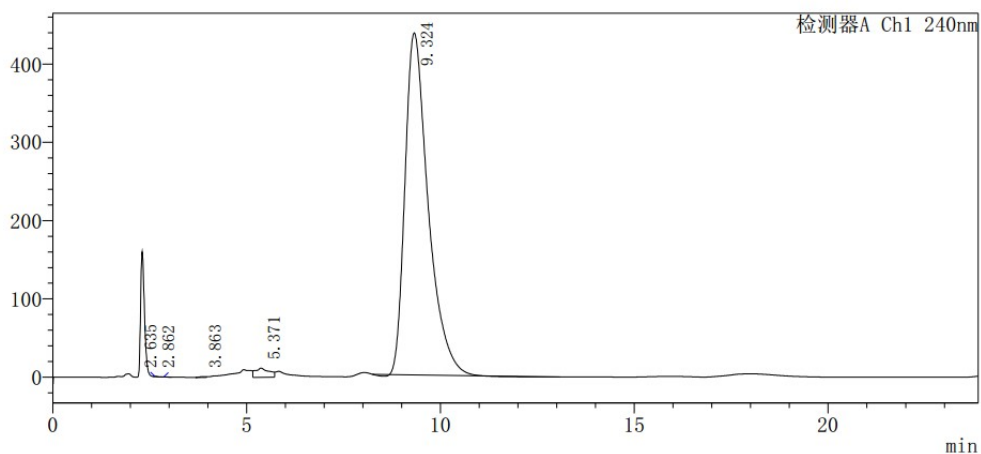

<峰表>

检测器A Ch1 240nm

| 峰号 | 保留时间  | 面积       | 高度     | 浓度     | 浓度单位 | 标记  | 化合物名 |
|----|-------|----------|--------|--------|------|-----|------|
| 1  | 2.635 | 1380     | 253    | 0.007  |      |     |      |
| 2  | 2.862 | 1786     | 203    | 0.010  |      |     |      |
| 3  | 3.863 | 10220    | 1039   | 0.055  |      |     |      |
| 4  | 5.371 | 299356   | 11805  | 1.619  |      |     |      |
| 5  | 9.324 | 18171909 | 437106 | 98.308 |      | S M |      |
| 总计 |       | 18484651 | 450405 |        |      |     |      |

Figure 51 The HPLC of compound 4j

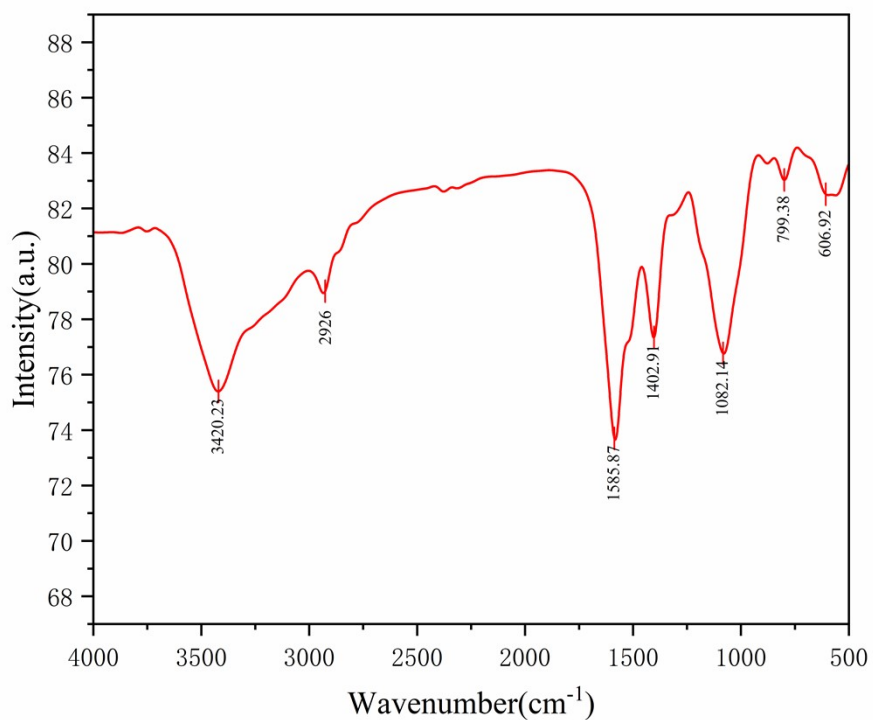

Figure 52 The IR spectrum of compound 4k



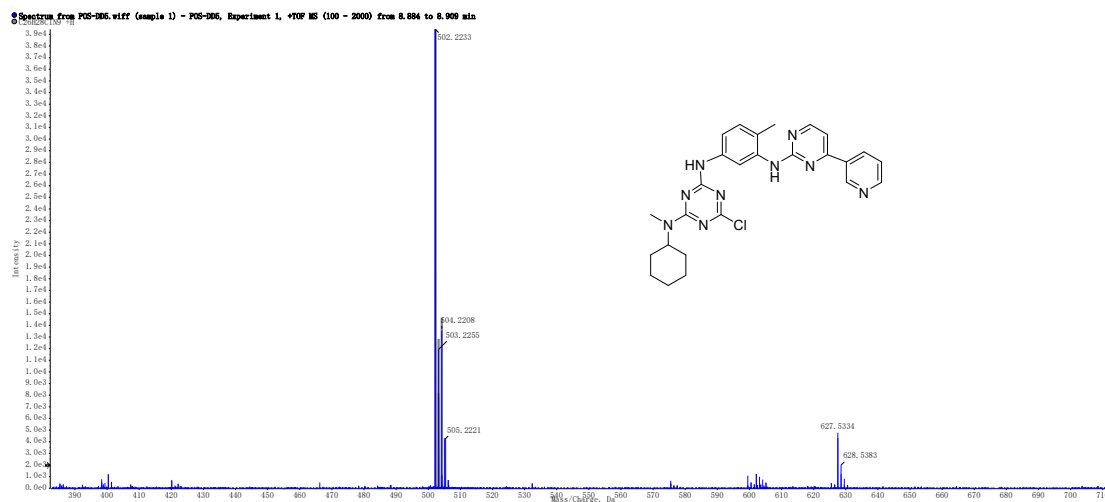

<色谱图>  
mV

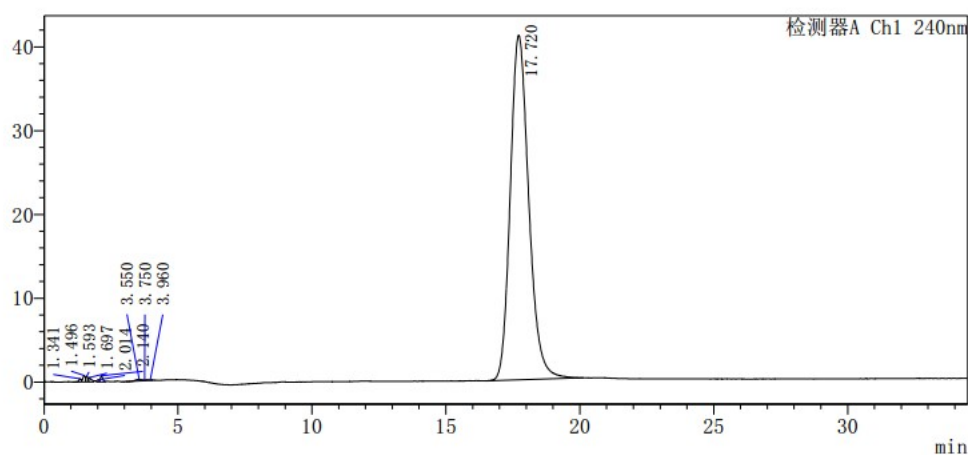

<峰表>

检测器A Ch1 240nm

| 峰号 | 保留时间   | 面积      | 高度    | 浓度     | 浓度单位 | 标记 | 化合物名 |
|----|--------|---------|-------|--------|------|----|------|
| 1  | 1.341  | 2325    | 391   | 0.116  |      | V  |      |
| 2  | 1.496  | 4874    | 781   | 0.244  |      | V  |      |
| 3  | 1.593  | 3694    | 679   | 0.185  |      | V  |      |
| 4  | 1.697  | 3720    | 511   | 0.186  |      | V  |      |
| 5  | 2.014  | 1436    | 252   | 0.072  |      | V  |      |
| 6  | 2.140  | 4587    | 726   | 0.229  |      | V  |      |
| 7  | 3.550  | 2897    | 179   | 0.145  |      |    |      |
| 8  | 3.750  | 1252    | 111   | 0.063  |      | V  |      |
| 9  | 3.960  | 1177    | 93    | 0.059  |      | V  |      |
| 10 | 17.720 | 1973532 | 41125 | 98.701 |      | S  |      |
| 总计 |        | 1999495 | 44848 |        |      |    |      |

Figure 56 The HPLC of compound 4k



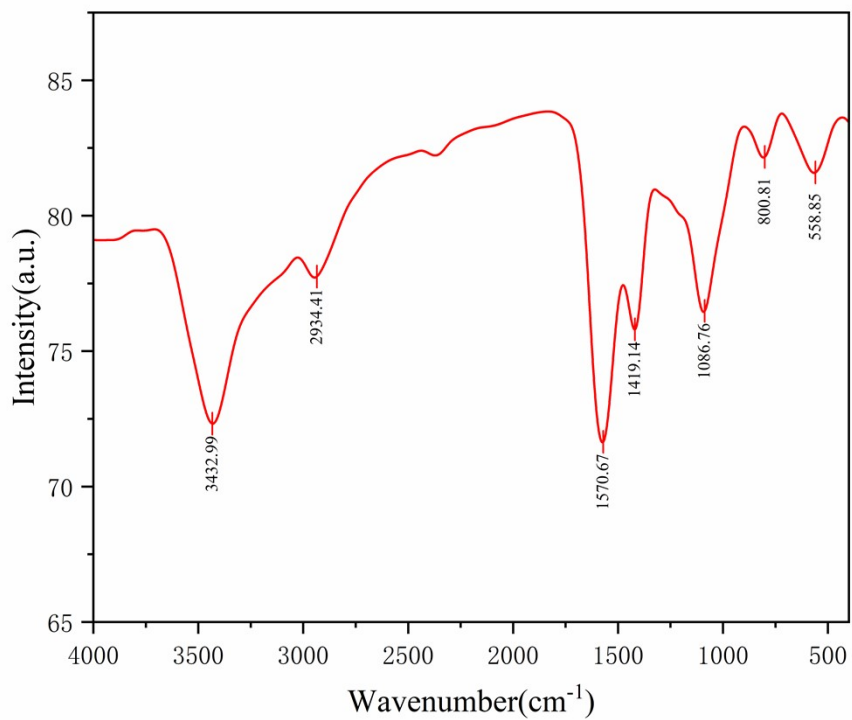

Figure 57 The IR spectrum of compound 41

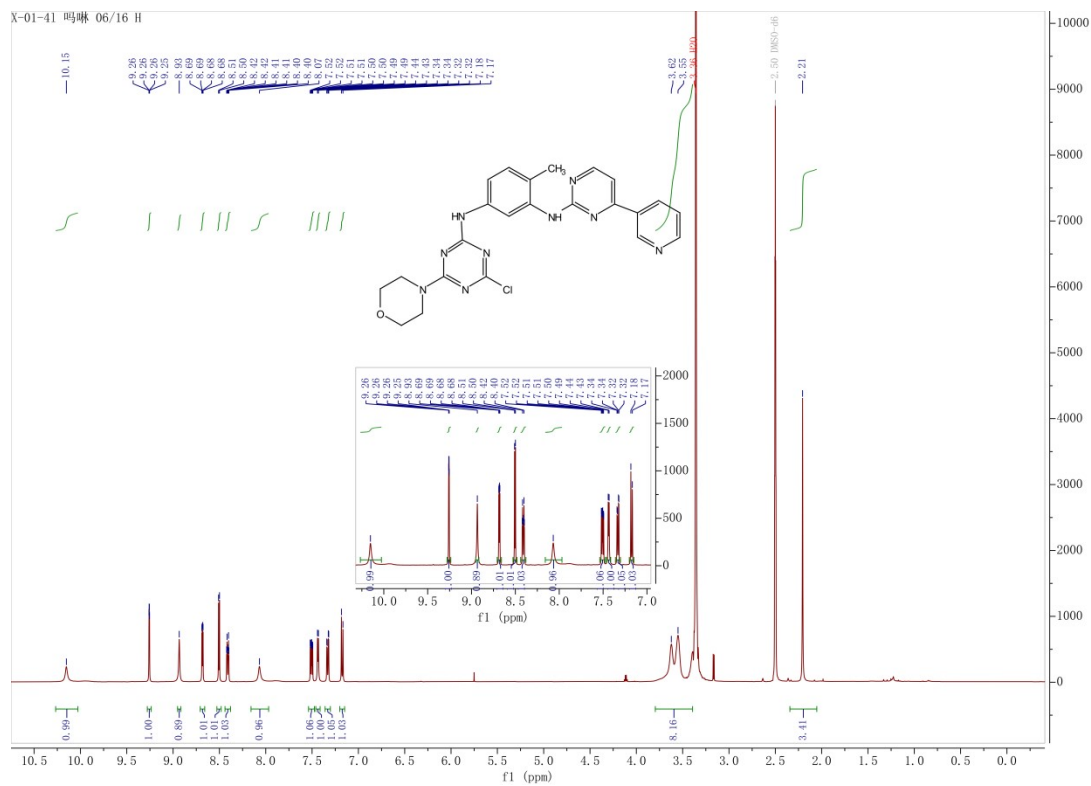

Figure 58 The <sup>1</sup>H NMR spectrum of compound 41

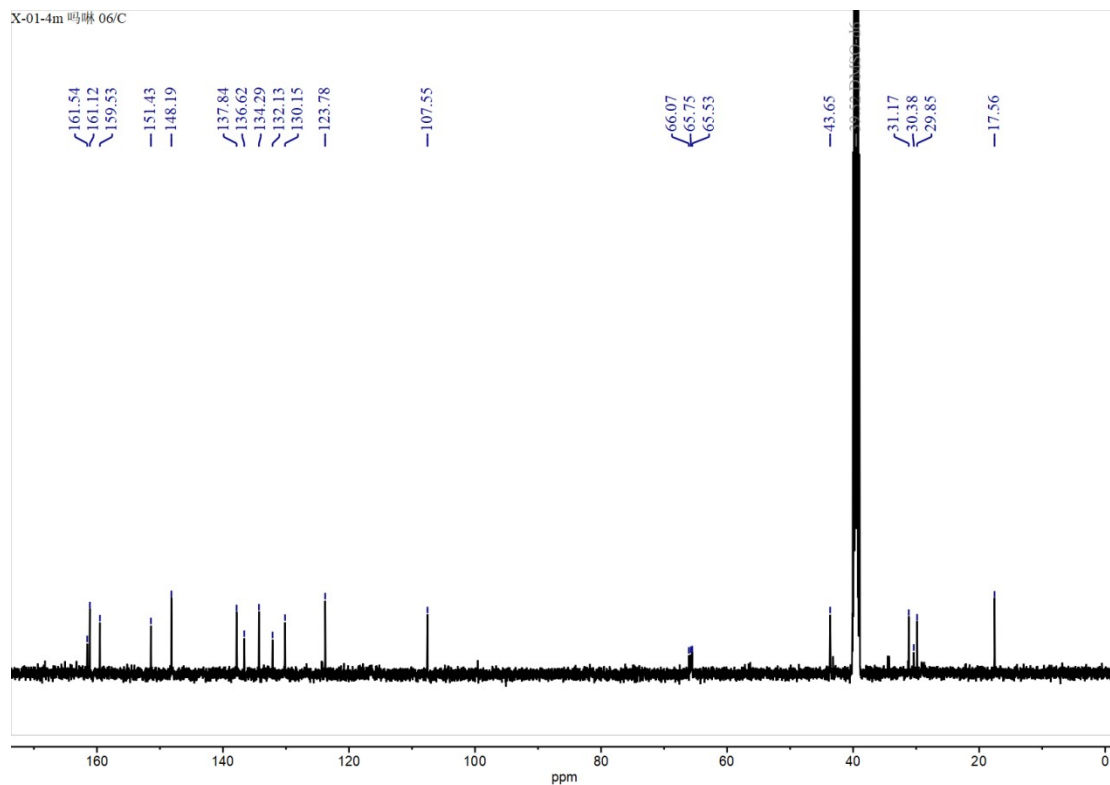

Figure 59 The  $^{13}\text{C}$  NMR spectrum of compound **41**

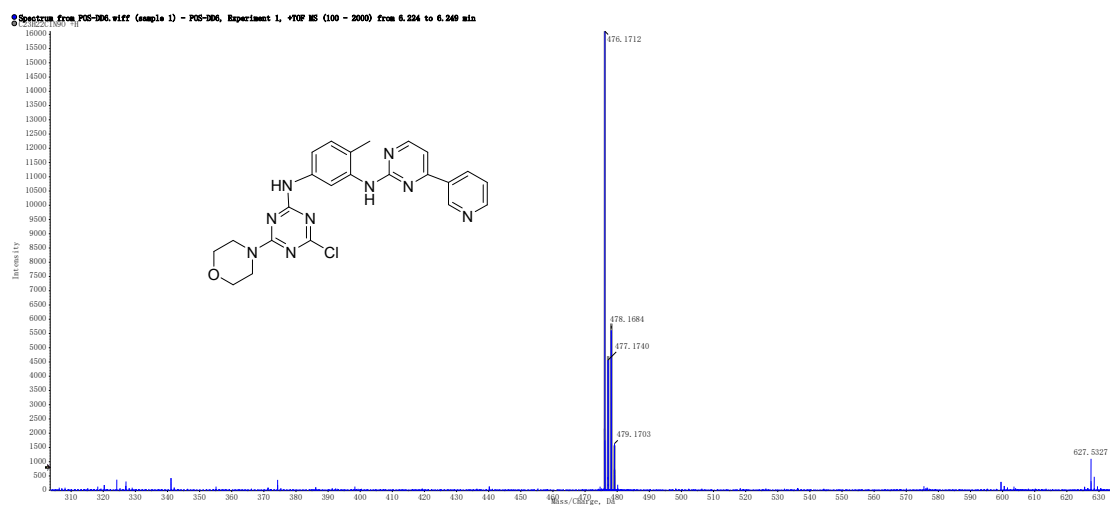

Figure 60 The HRMS spectrum of compound **41**

<色谱图>

mV

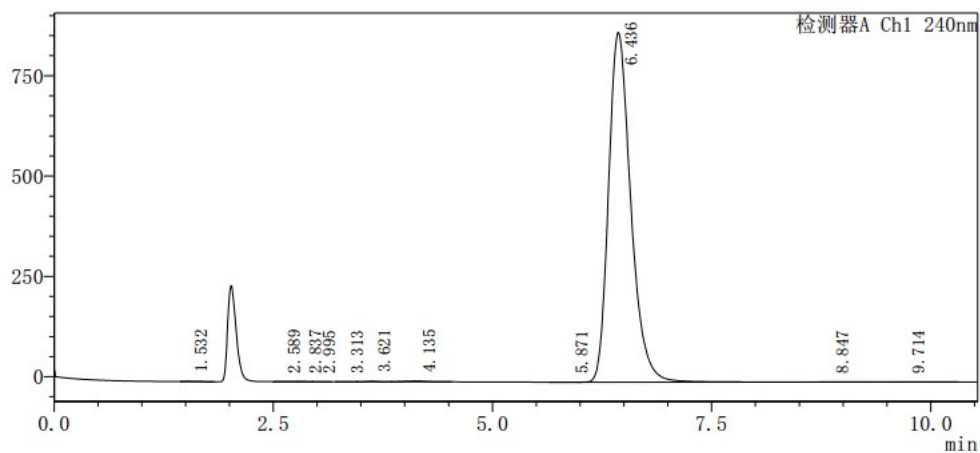

<峰表>

检测器A Ch1 240nm

| 峰号 | 保留时间  | 面积       | 高度     | 浓度     | 浓度单位 | 标记 | 化合物名 |
|----|-------|----------|--------|--------|------|----|------|
| 1  | 1.532 | 4070     | 612    | 0.026  |      |    |      |
| 2  | 2.589 | 4095     | 385    | 0.026  |      |    |      |
| 3  | 2.837 | 2050     | 240    | 0.013  |      | V  |      |
| 4  | 2.995 | 1958     | 233    | 0.013  |      | V  |      |
| 5  | 3.313 | 1433     | 209    | 0.009  |      |    |      |
| 6  | 3.621 | 12463    | 1367   | 0.080  |      |    |      |
| 7  | 4.135 | 37697    | 2296   | 0.243  |      |    |      |
| 8  | 5.871 | 1250     | 108    | 0.008  |      |    |      |
| 9  | 6.436 | 15411452 | 871244 | 99.506 |      | SV |      |
| 10 | 8.847 | 1139     | 69     | 0.007  |      | TV |      |
| 11 | 9.714 | 10430    | 421    | 0.067  |      | T  |      |
| 总计 |       | 15488038 | 877183 |        |      |    |      |

Figure 61 The HPLC of compound 41

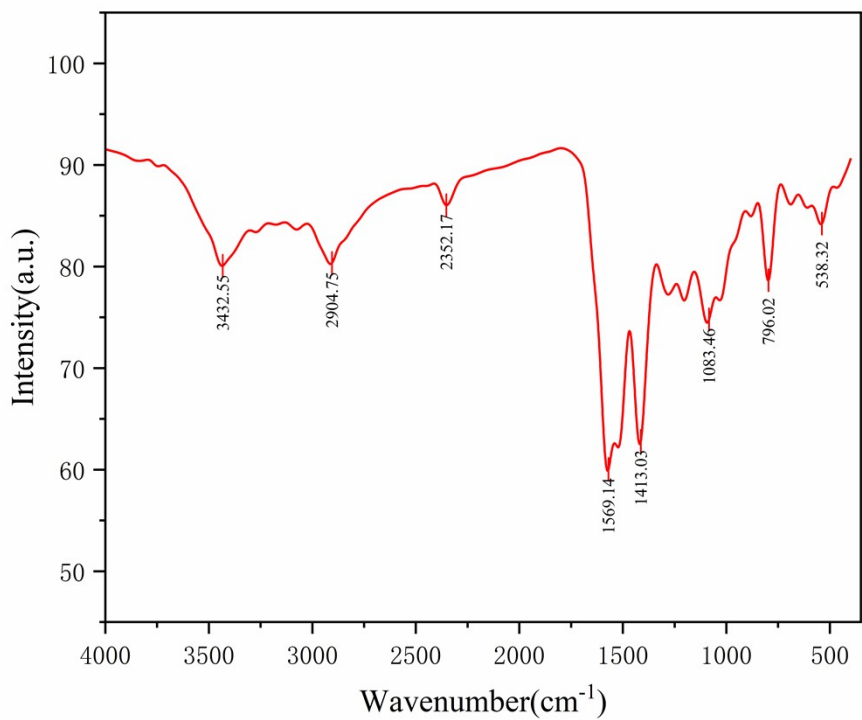

Figure 62 The IR spectrum of compound **4m**

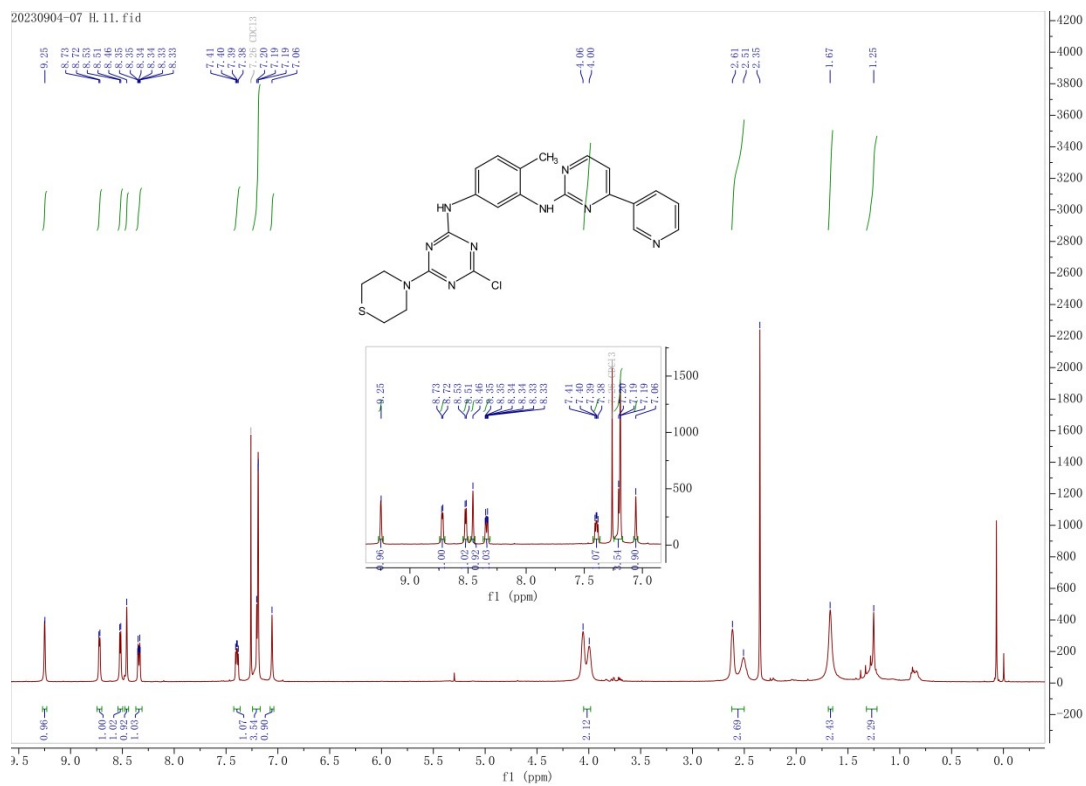

Figure 63 The <sup>1</sup>H NMR spectrum of compound **4m**

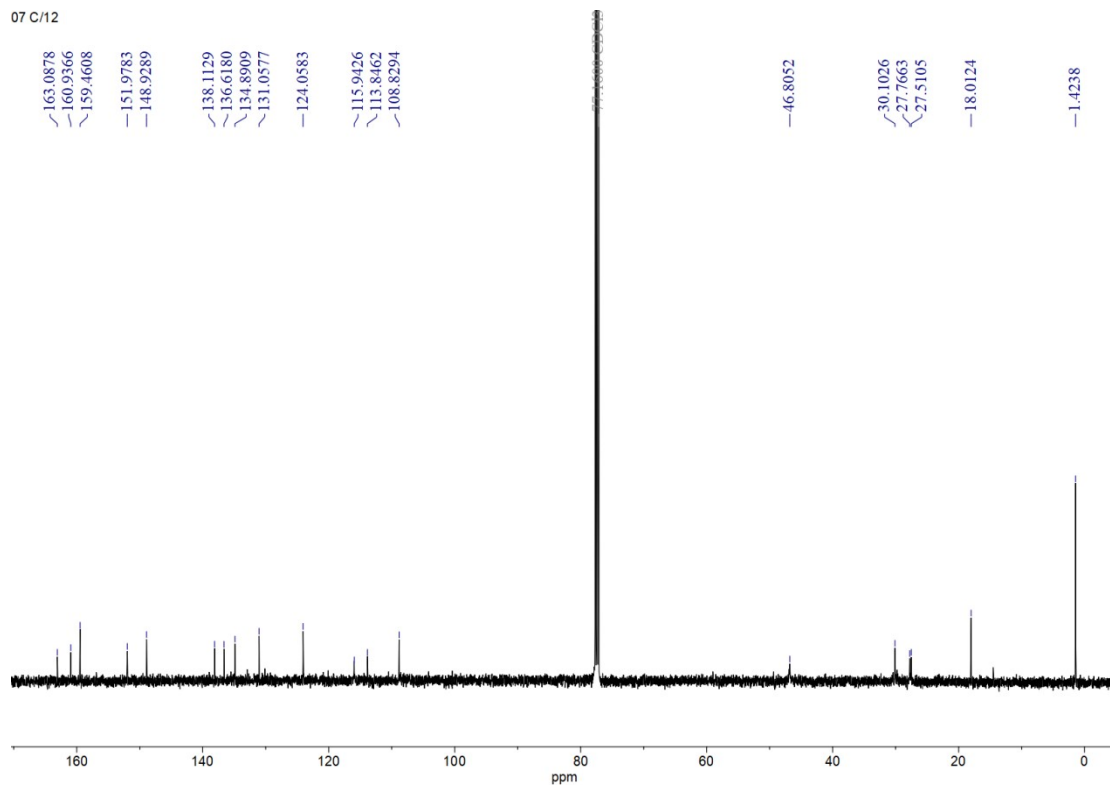

Figure 64 The  $^{13}\text{C}$  NMR spectrum of compound **4m**

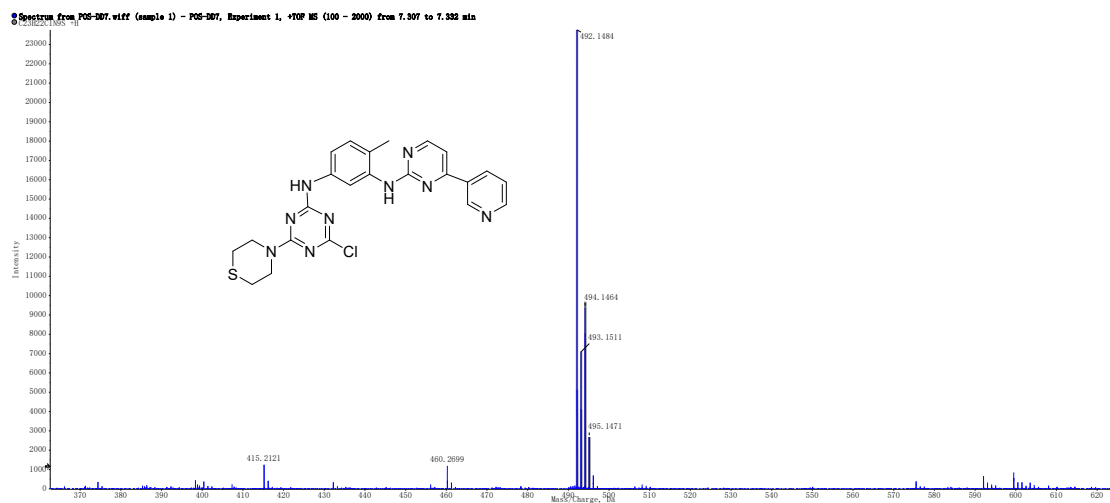

Figure 65 The HRMS spectrum of compound **4m**

<色谱图>

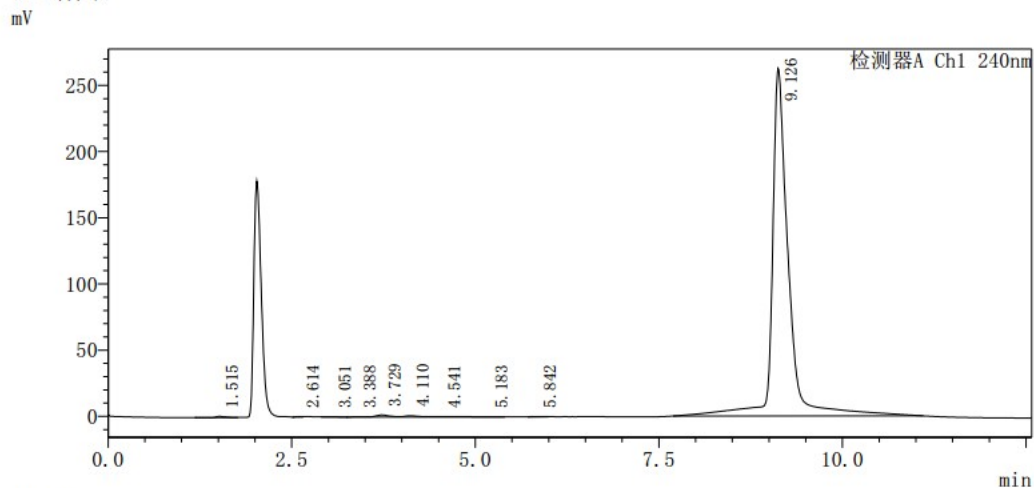

<峰表>

检测器A Ch1 240nm

| 峰号 | 保留时间  | 面积      | 高度     | 浓度     | 浓度单位 | 标记 | 化合物名 |
|----|-------|---------|--------|--------|------|----|------|
| 1  | 1.515 | 12151   | 1067   | 0.297  |      | V  |      |
| 2  | 2.614 | 2362    | 389    | 0.058  |      |    |      |
| 3  | 3.051 | 2742    | 249    | 0.067  |      |    |      |
| 4  | 3.388 | 1846    | 212    | 0.045  |      |    |      |
| 5  | 3.729 | 22139   | 1646   | 0.541  |      | V  |      |
| 6  | 4.110 | 14123   | 1011   | 0.345  |      | V  |      |
| 7  | 4.541 | 13192   | 434    | 0.323  |      | V  |      |
| 8  | 5.183 | 4187    | 198    | 0.102  |      | V  |      |
| 9  | 5.842 | 4051    | 268    | 0.099  |      |    |      |
| 10 | 9.126 | 4012405 | 262424 | 98.122 |      | M  |      |
| 总计 |       | 4089199 | 267898 |        |      |    |      |

Figure 66 The HPLC of compound **4m**

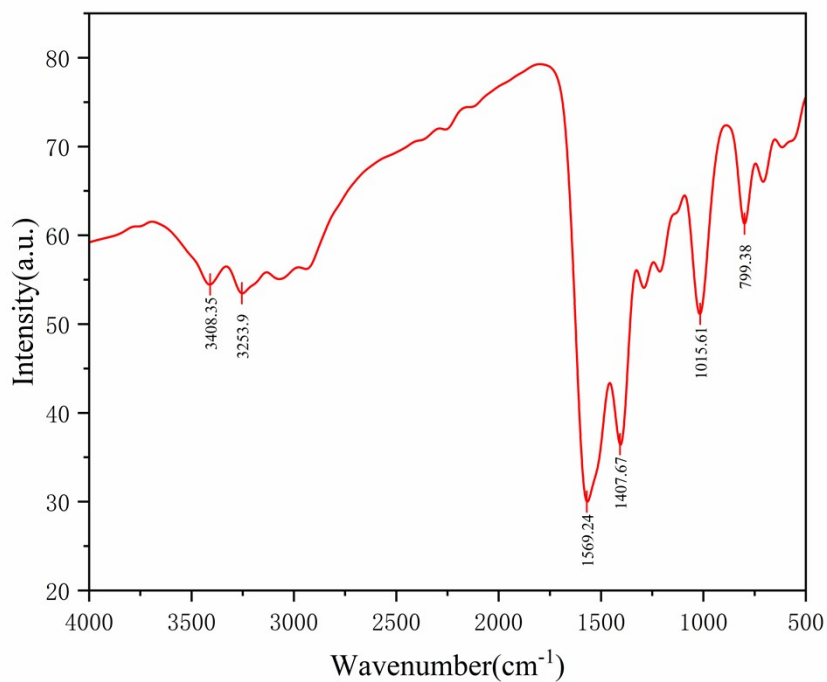

Figure 67 The IR spectrum of compound **4n**



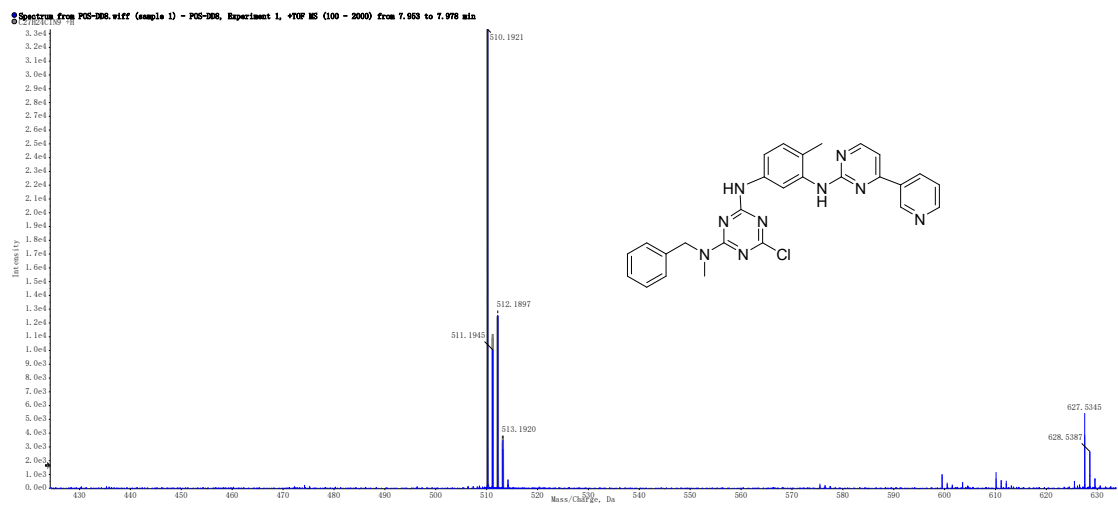

Figure 70 The HRMS spectrum of compound 4n

<色谱图>

mV

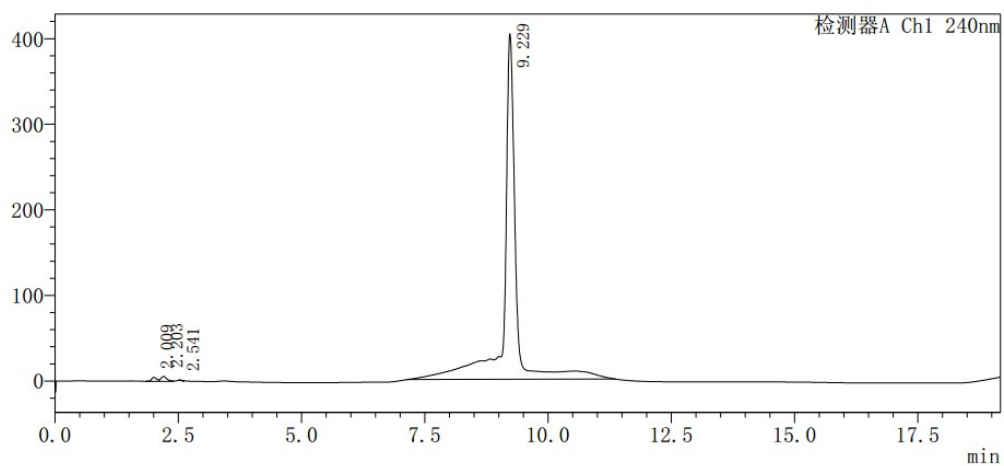

<峰表>

检测器A Ch1 240nm

| 峰号 | 保留时间  | 面积      | 高度     | 浓度     | 浓度单位 | 标记 | 化合物名 |
|----|-------|---------|--------|--------|------|----|------|
| 1  | 2.009 | 32919   | 4580   | 0.490  |      |    |      |
| 2  | 2.203 | 48854   | 5752   | 0.727  |      | V  |      |
| 3  | 2.541 | 1685    | -115   | 0.025  |      | M  |      |
| 4  | 9.229 | 6639792 | 403310 | 98.759 |      | M  |      |
| 总计 |       | 6723250 | 413528 |        |      |    |      |

Figure 71 The HPLC of compound 4n



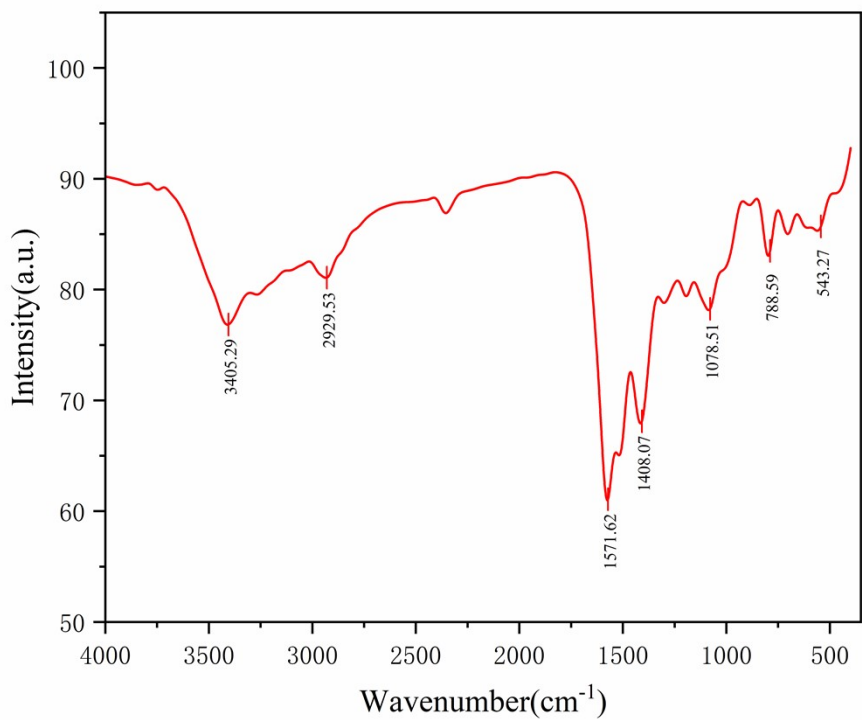

Figure 72 The IR spectrum of compound 4o

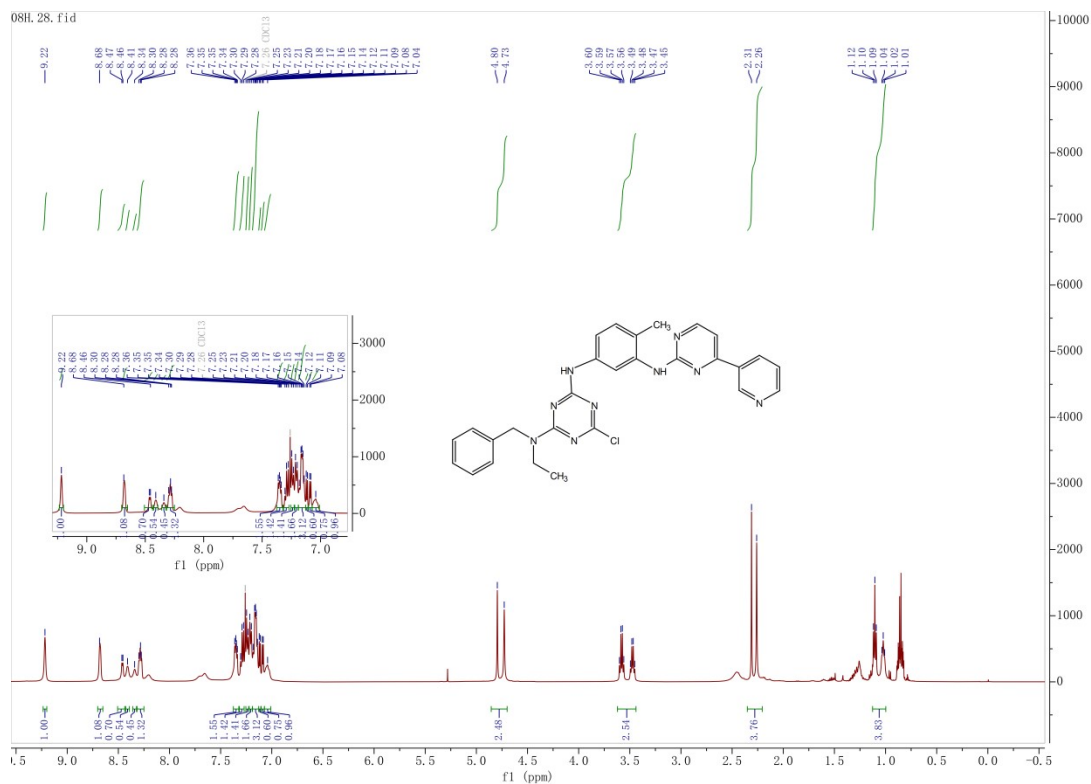

Figure 73 The <sup>1</sup>H NMR spectrum of compound 4o

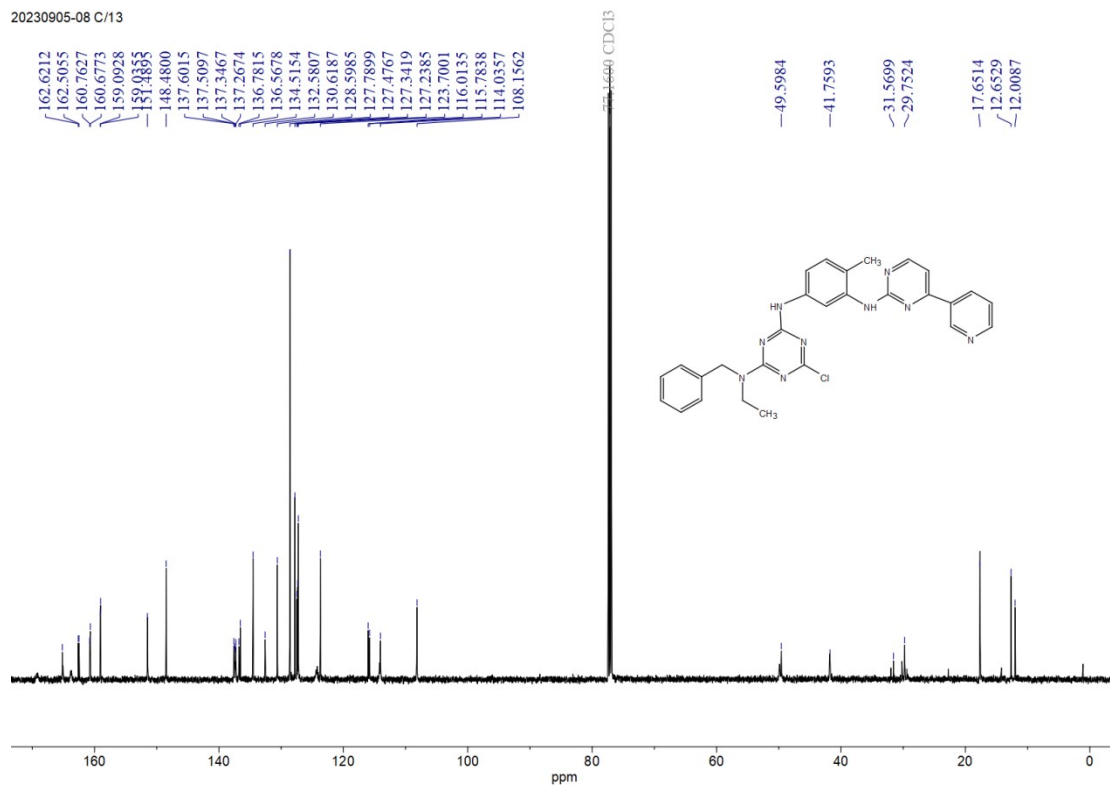

Figure 74 The <sup>13</sup>C NMR spectrum of compound 40

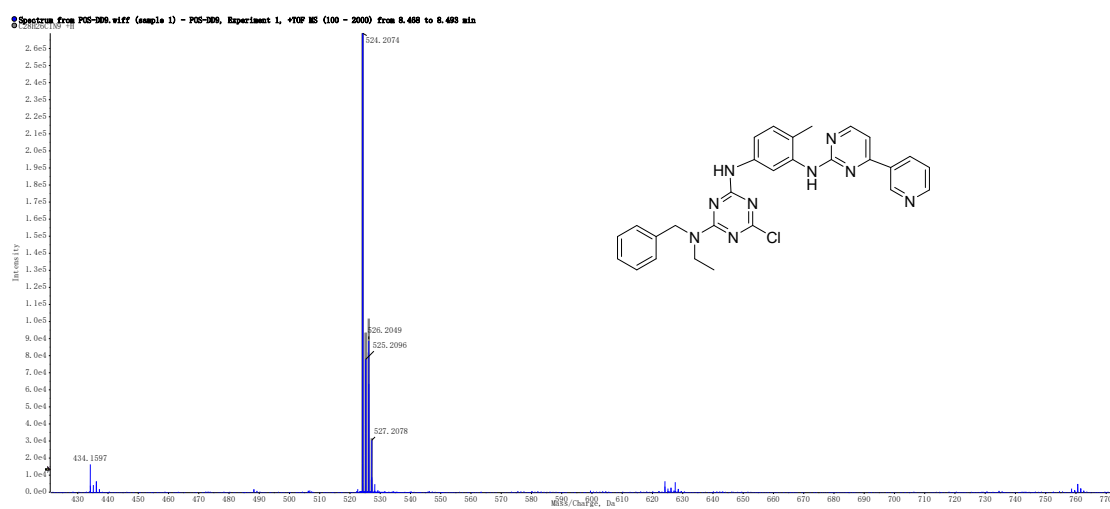

Figure 75 The HRMS spectrum of compound 40

<色谱图>

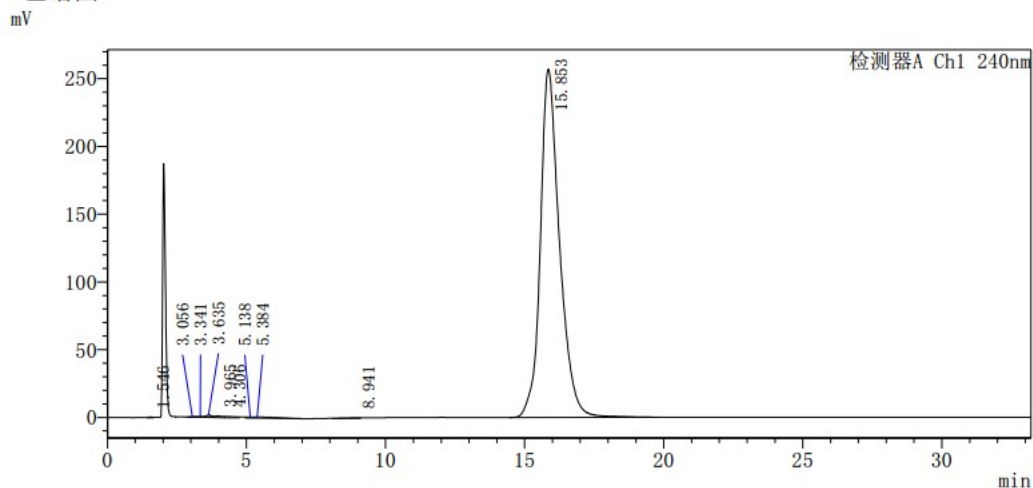

<峰表>

检测器A Ch1 240nm

| 峰号 | 保留时间   | 面积       | 高度     | 浓度     | 浓度单位 | 标记 | 化合物名 |
|----|--------|----------|--------|--------|------|----|------|
| 1  | 1.546  | 5517     | 628    | 0.044  |      |    |      |
| 2  | 3.056  | 7214     | 527    | 0.058  |      |    |      |
| 3  | 3.341  | 11452    | 734    | 0.091  |      | V  |      |
| 4  | 3.635  | 28037    | 1771   | 0.224  |      | V  |      |
| 5  | 3.965  | 20888    | 1274   | 0.167  |      | V  |      |
| 6  | 4.306  | 25897    | 860    | 0.207  |      | V  |      |
| 7  | 5.138  | 12895    | 756    | 0.103  |      |    |      |
| 8  | 5.384  | 48736    | 848    | 0.389  |      | V  |      |
| 9  | 8.941  | 16167    | 410    | 0.129  |      |    |      |
| 10 | 15.853 | 12340554 | 257002 | 98.588 |      | S  |      |
| 总计 |        | 12517357 | 264811 |        |      |    |      |

Figure 76 The HPLC of compound **4o**

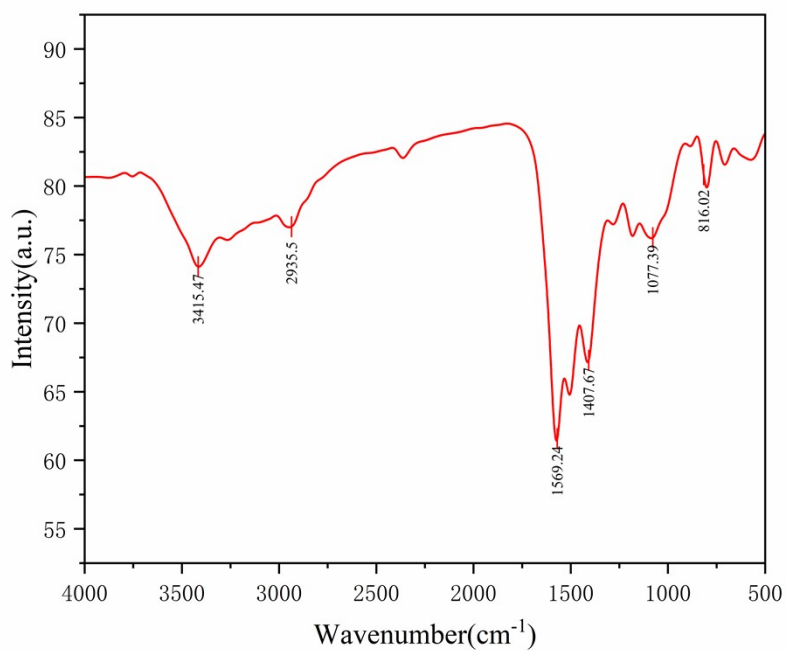

Figure 77 The IR spectrum of compound **4p**

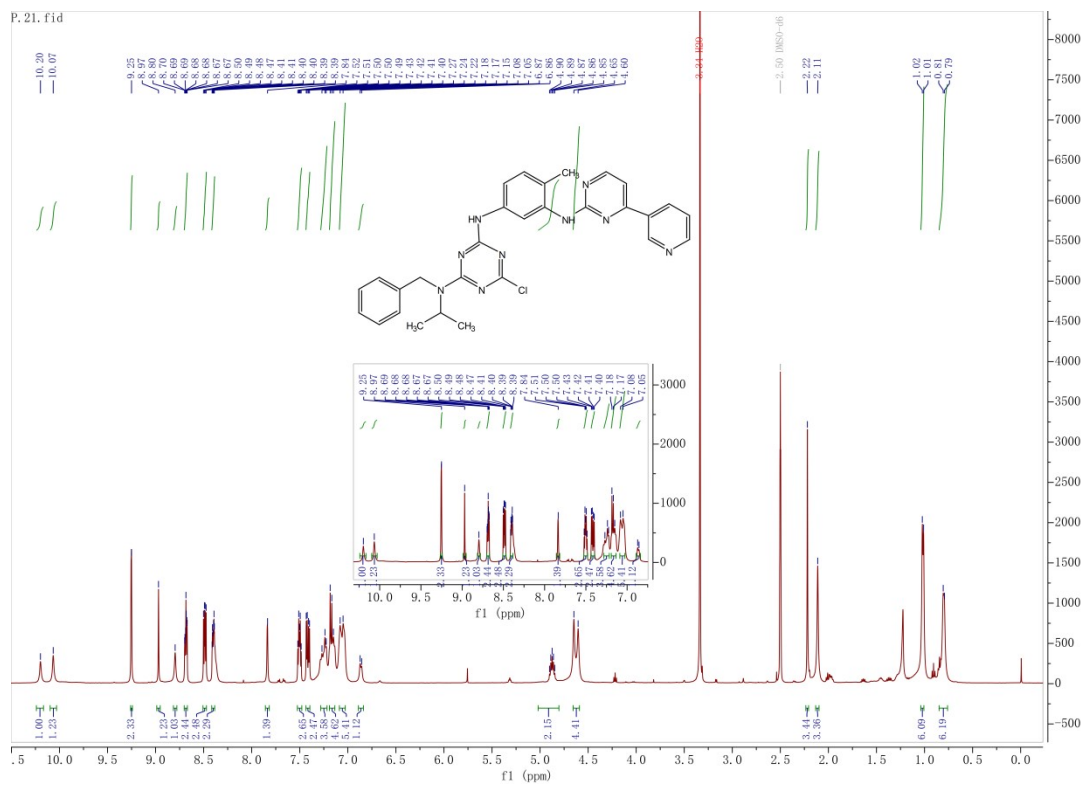

Figure 78 The  $^1\text{H}$  NMR spectrum of compound 4p

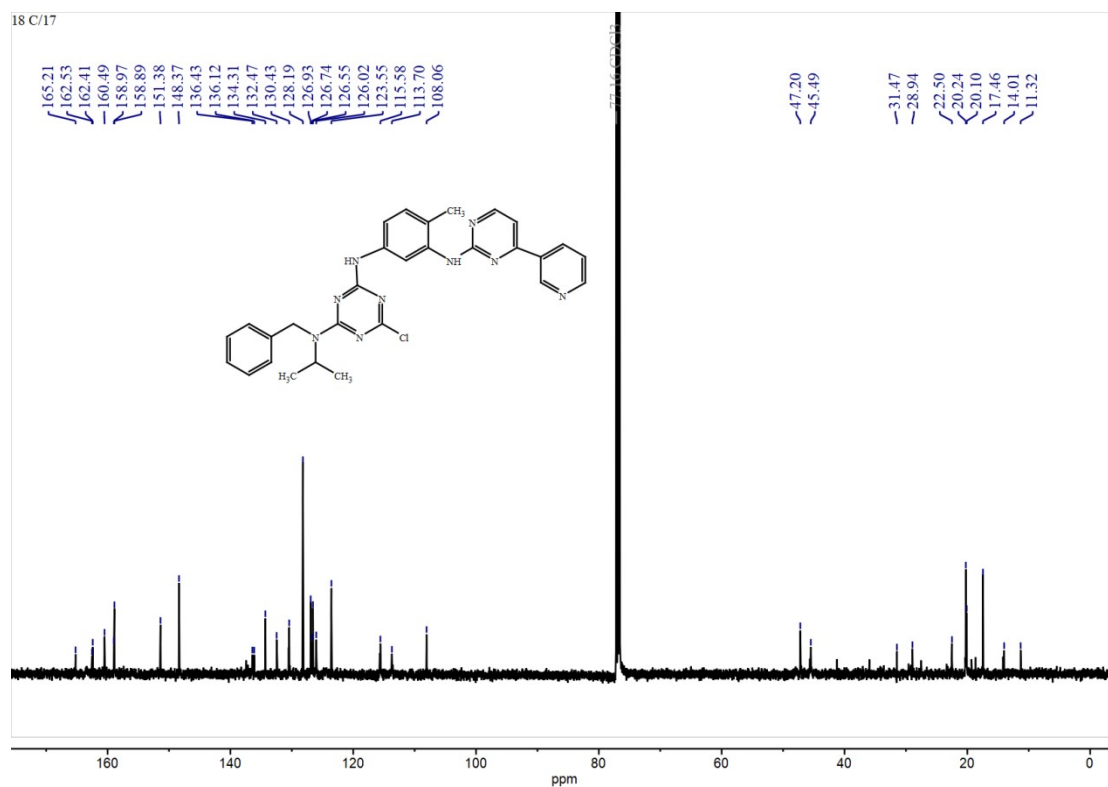

Figure 79 The  $^{13}\text{C}$  NMR spectrum of compound 4p

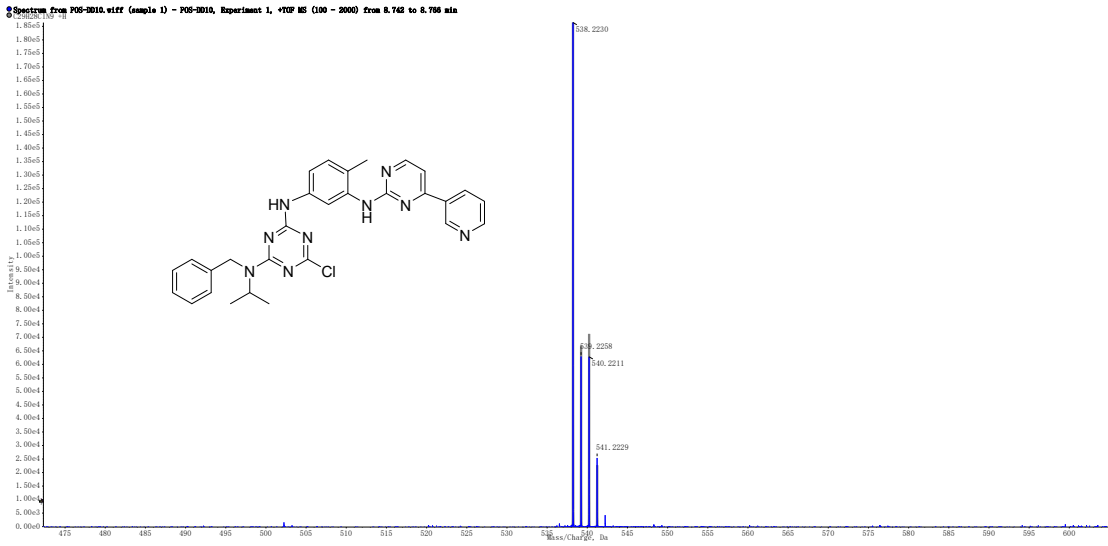

Figure 80 The HRMS spectrum of compound 4p

<色谱图>

mV

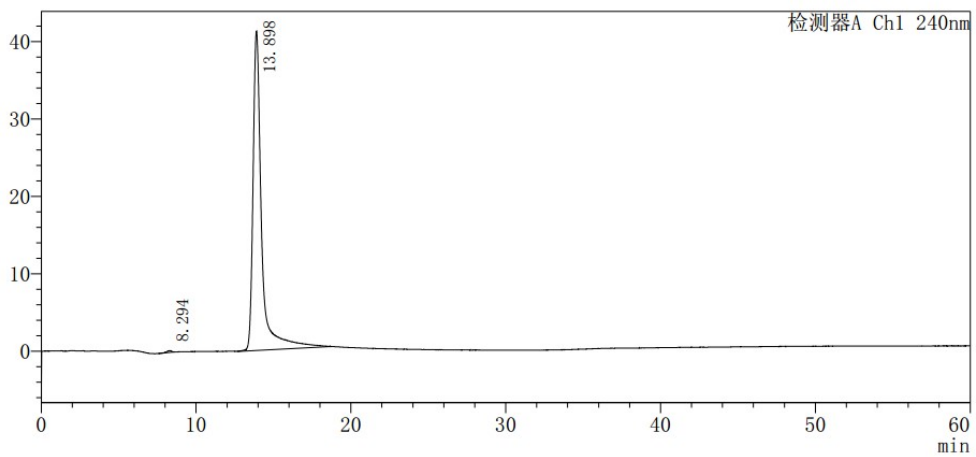

<峰表>

检测器A Ch1 240nm

| 峰号 | 保留时间   | 面积      | 高度    | 浓度    | 浓度单位 | 标记 | 化合物名 |
|----|--------|---------|-------|-------|------|----|------|
| 1  | 8.294  | 5143    | 234   | 0.000 |      |    |      |
| 2  | 13.898 | 1582608 | 41247 | 0.000 |      | S  |      |
| 总计 |        | 1587752 | 41481 |       |      |    |      |

Figure 81 The HPLC of compound 4p

Table 1 Crystallographic data for compound **4a**

| Compound                               | <b>4a</b>                                                      |
|----------------------------------------|----------------------------------------------------------------|
| Formula                                | C <sub>24</sub> H <sub>25</sub> Cl <sub>4</sub> N <sub>9</sub> |
| Formula weight                         | 461.96                                                         |
| Crystal shape/color                    | Plate/yellow                                                   |
| Temperature/K                          | 296.15                                                         |
| Crystal system                         | triclinic                                                      |
| Space group                            | P-1                                                            |
| a/Å                                    | 9.478(4)                                                       |
| b/Å                                    | 12.216(5)                                                      |
| c/Å                                    | 13.705(6)                                                      |
| $\alpha$ /°                            | 105.816(5)                                                     |
| $\beta$ /°                             | 107.239(6)                                                     |
| $\gamma$ / °                           | 101.579(6)                                                     |
| Volume /Å <sup>3</sup>                 | 1388.1(10)                                                     |
| Z                                      | 2                                                              |
| $\rho_{\text{calc}}$ g/cm <sup>3</sup> | 1.391                                                          |
| $\mu$ /mm <sup>-1</sup>                | 0.458                                                          |
| F (000)                                | 600.0                                                          |
| Crystal size/mm <sup>3</sup>           | 0.21 × 0.15 × 0.11                                             |

|                                                  |                                                                   |
|--------------------------------------------------|-------------------------------------------------------------------|
| Radiation                                        | MoK $\alpha$ ( $\lambda = 0.71073$ )                              |
| 2 $\Theta$ range for data collection/ $^{\circ}$ | 3.328 to 55.108                                                   |
| Index ranges                                     | $-8 \leq h \leq 12$ , $-15 \leq k \leq 15$ , $-17 \leq l \leq 17$ |
| Reflections collected                            | 8622                                                              |
| Independent reflections                          | 6174 [Rint = 0.0214, Rsigma = 0.0432]                             |
| Data/restraints/parameters                       | 6174/103/337                                                      |
| Goodness-of-fit on F <sup>2</sup>                | 1.070                                                             |
| Final R indexes [I $\geq$ 2 $\sigma$ (I)]        | R1 = 0.0806, wR2 = 0.2349                                         |
| Final R indexes [all data]                       | R1 = 0.1091, wR2 = 0.2625                                         |
| Largest diff. peak/hole / e $\text{\AA}^{-3}$    | 0.74/-0.71                                                        |

---
